# Supplementary material for: A Hyperactive Form of unc-13 Enhances Ca2+ Sensitivity and Synaptic Vesicle Release Probability in C. elegans
Source: PubMed Central journal article supplement — Cell Rep. Author manuscript; Available in PMC 2019 Oct 7. (PMC6779330; doi:10.1016/j.celrep.2019.08.018), 2019-09-10
Supplement: NIHMS1539599-supplement-1.pdf [file NIHMS1539599-supplement-1.pdf]

Cell Reports, Volume 28

## Supplemental Information

### **A Hyperactive Form of *unc-13* Enhances Ca<sup>2+</sup> Sensitivity and Synaptic Vesicle Release Probability in *C. elegans***

**Lei Li, Haowen Liu, Qi Hall, Wei Wang, Yi Yu, Joshua M. Kaplan, and Zhitao Hu**

**Figure S1**

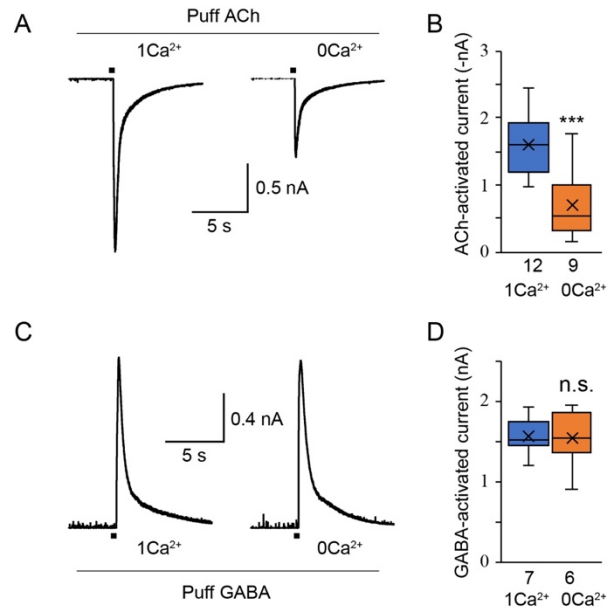

**Figure S1. The channel conductance of ACh receptors is reduced in 0mM  $\text{Ca}^{2+}$ . Related to Figure 1.** (A) Example traces of ACh-activated currents recorded from wild-type animals in 1mM and 0mM  $\text{Ca}^{2+}$  bath solutions. (B) Boxplot of the currents from A. (C) Example traces of GABA-activated currents recorded in 1mM and 0mM  $\text{Ca}^{2+}$  bath solutions, respectively. (D) Boxplot of the amplitude of the currents from C. Data are presented as box-and-whisker plots with the median (line) and mean (cross) indicated (\*\*\*,  $p < 0.001$  when compared to the 1mM  $\text{Ca}^{2+}$  recordings; n.s., non-significant when compared to the 1mM  $\text{Ca}^{2+}$  recordings; student's t-test). The number of worms analyzed for each genotype is indicated under each box.

**Figure S2**

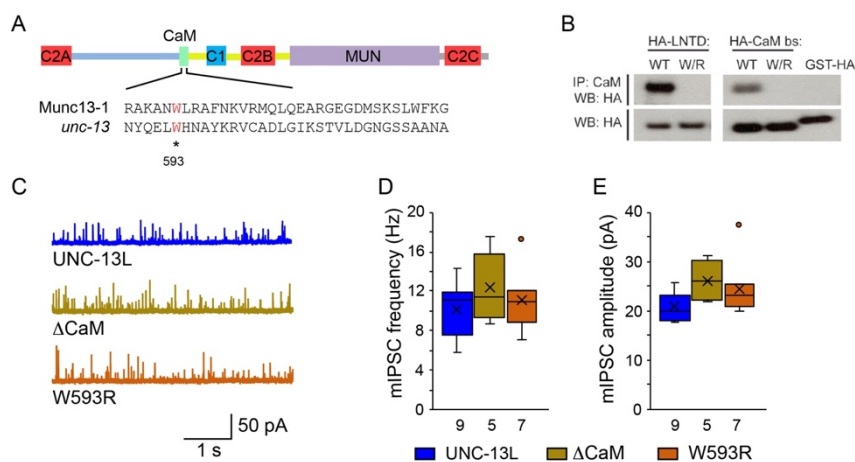

**Figure S2. Effects of calmodulin binding UNC-13L on tonic release. Related to Figure 1.** (A) Sequence alignment of the CaM domain between worm *unc-13* and rat Munc13-1. (B) Co-immunoprecipitation shows binding of the UNC-13L CaM domain and calmodulin. The binding is disrupted by mutating the conserved tryptophan (W593) to arginine (R) in the CaM domain. (C-E) Example traces of the mIPSCs and averaged mIPSC frequency and amplitude from the indicated genotypes. Data are presented as box-and-whisker plots with the median (line) and mean (cross) indicated (n.s., non-significant when compared to the UNC-13L rescue; D, one-way ANOVA; E, one-way ANOVA following Dunn's test). The number of worms analyzed for each genotype is indicated under each box.

**Figure S3**

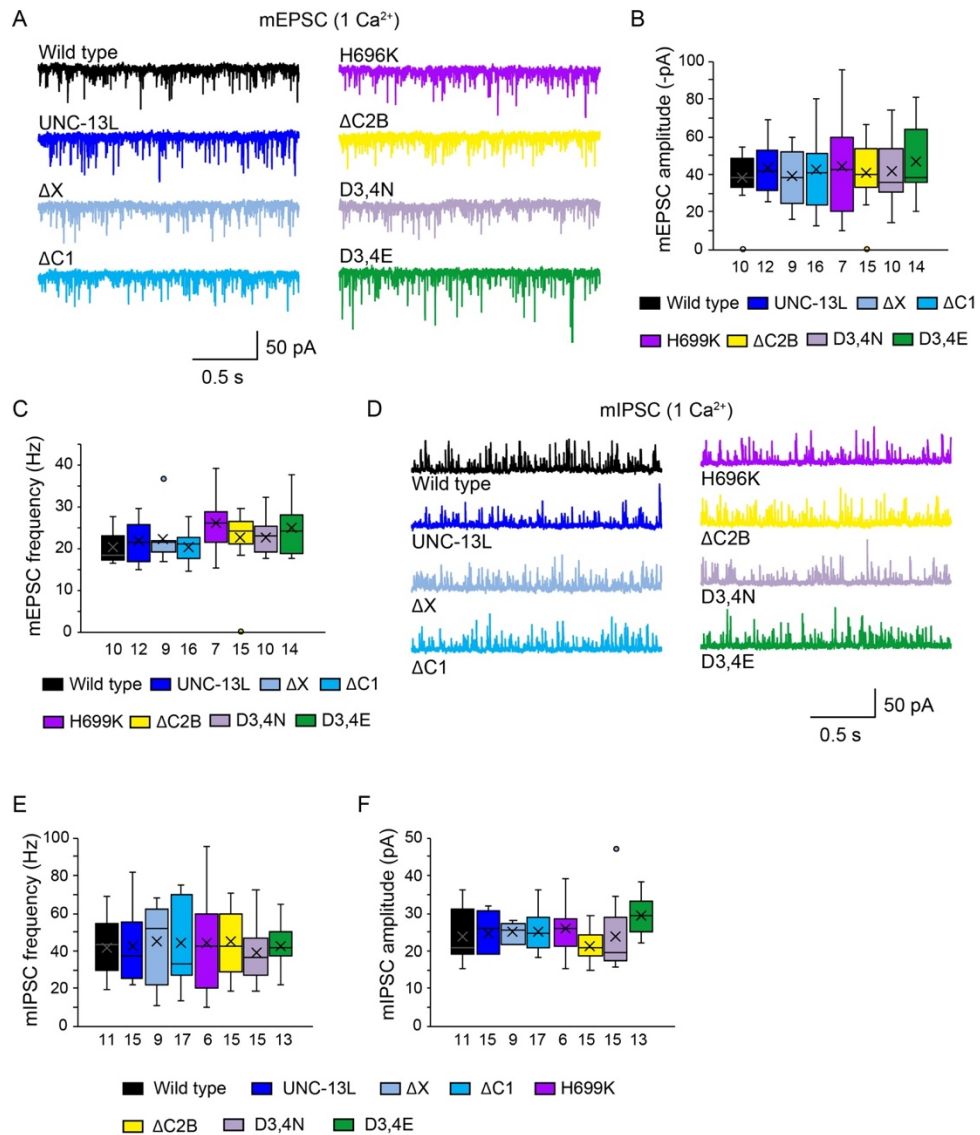

**Figure S3. Tonic release in 1mM  $\text{Ca}^{2+}$  is unaltered by disrupting single domain function in UNC-13L.** Related to Figure 2. (A) Representative mEPSC traces recorded from *unc-13* mutants rescued by the indicated constructs in 1mM  $\text{Ca}^{2+}$ . (B, C) Boxplot of mEPSC frequency and amplitude from the indicated genotypes in A. (D) Representative mIPSC traces recorded from *unc-13* mutants rescued by the indicated constructs in 1mM  $\text{Ca}^{2+}$ . (E, F) Boxplot of mIPSC frequency and amplitude from the indicated genotypes in D. Data are shown as box-and-whisker plots with the median (line) and mean (cross) indicated (one-way ANOVA for data in B, E, one-way ANOVA following Kruskal-Wallis test for data in C, F). The number of worms analyzed for each genotype is indicated under each box.

**Figure S4**

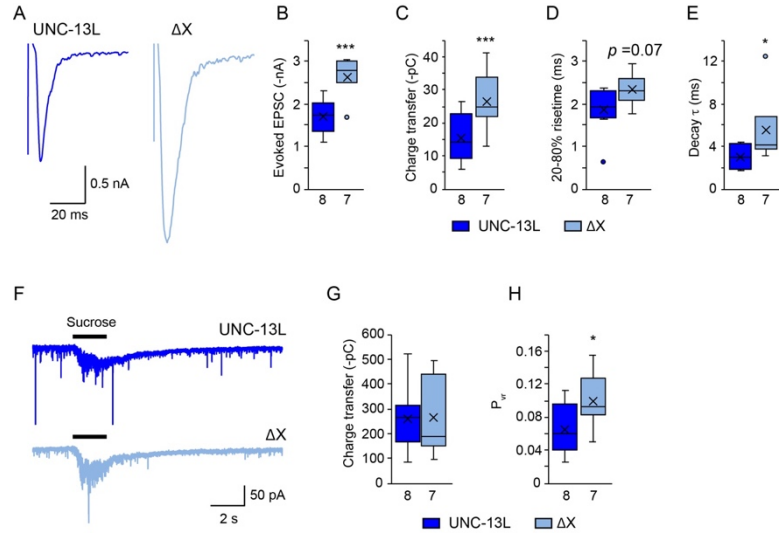

**Figure S4. The X domain inhibits evoked neurotransmitter release but not priming. Related to Figure 3.** (A) Example traces of stimulus-evoked EPSCs recorded in 1mM Ca<sup>2+</sup> from UNC-13L rescue (blue) and UNC-13LΔX rescue (red) animals. (B-E) Quantification of the evoked EPSC amplitude, charge transfer, 20-80% risetime, and decay from the same genotypes as in A. (F) Hypertonic sucrose-evoked current recorded from UNC-13L rescue (blue) and UNC-13LΔX rescue (red) animals. (K) Averaged charge transfer from the sucrose-evoked currents in F. (L) Quantification of the probability of synaptic vesicle release ( $P_{vr}$ ) from the indicated genotypes. Data are shown as box-and-whisker plots with the both median (line) and mean (cross) indicated (\*,  $p < 0.05$ , \*\*\*,  $p < 0.001$  when compared to the UNC-13L rescue; Mann-Whitney test for data in E, student's t-test for all others). The number of worms analyzed for each genotype is indicated under each box.

**Figure S5**

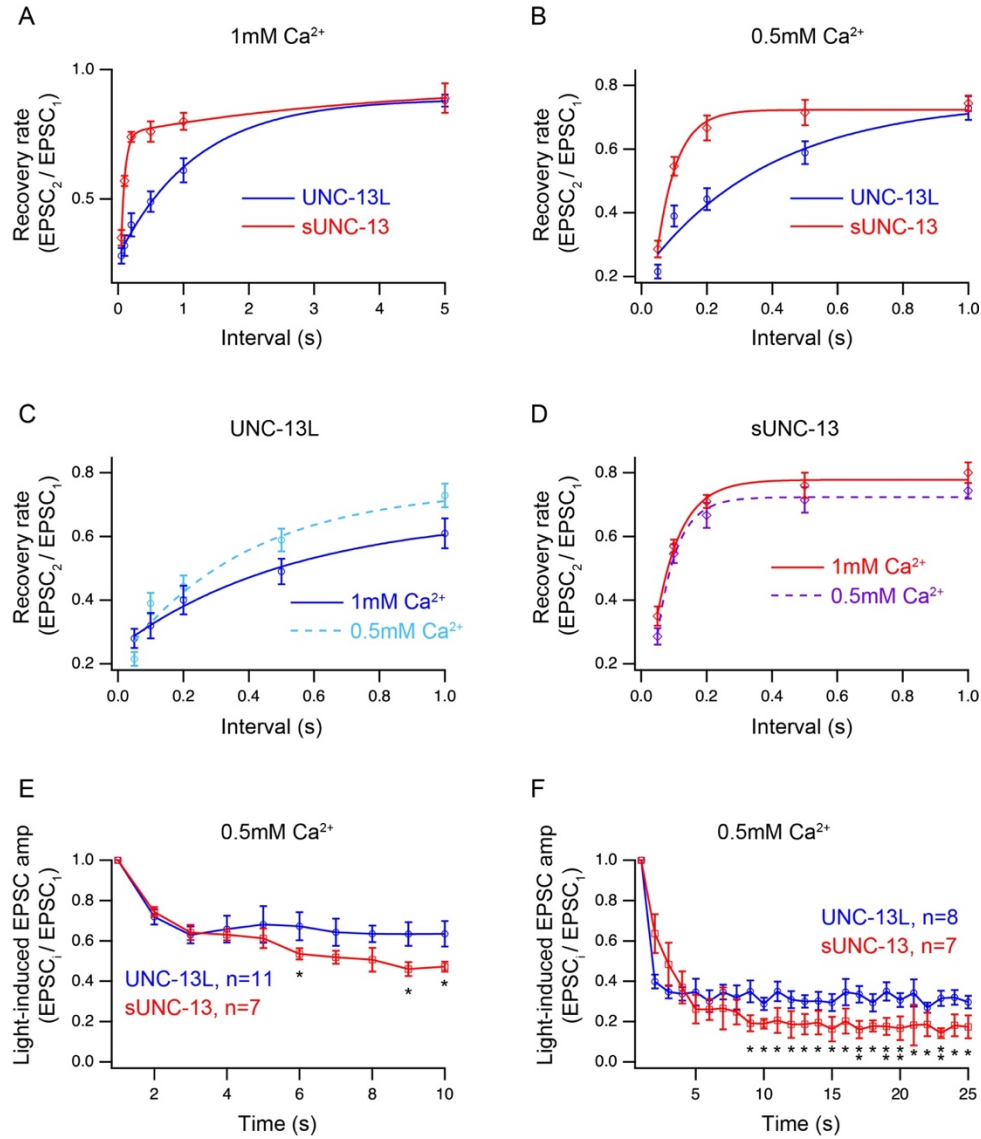

**Figure S5. Synaptic recovery and depression in 0.5mM Ca<sup>2+</sup>. Related to Figure 4.** Averaged synaptic recovery rescued by UNC-13L and sUNC-13 in 1mM Ca<sup>2+</sup> (A) and 0.5mM Ca<sup>2+</sup> (B). The recovery rate was calculated by the ratio of EPSC<sub>2</sub> to EPSC<sub>1</sub> in the paired stimulus. (C, D) Comparison of synaptic recovery between 1mM and 0.5mM Ca<sup>2+</sup> in the same genotype. (E, F) Quantification of synaptic depression by normalizing the EPSC amplitude (EPSC<sub>i</sub>) to the first EPSC amplitude in 0.5mM Ca<sup>2+</sup>. Data are mean  $\pm$  SEM (\*,  $p < 0.05$ , \*\*,  $p < 0.01$  when compared to the UNC-13L rescue; student's t-test).

**Figure S6**

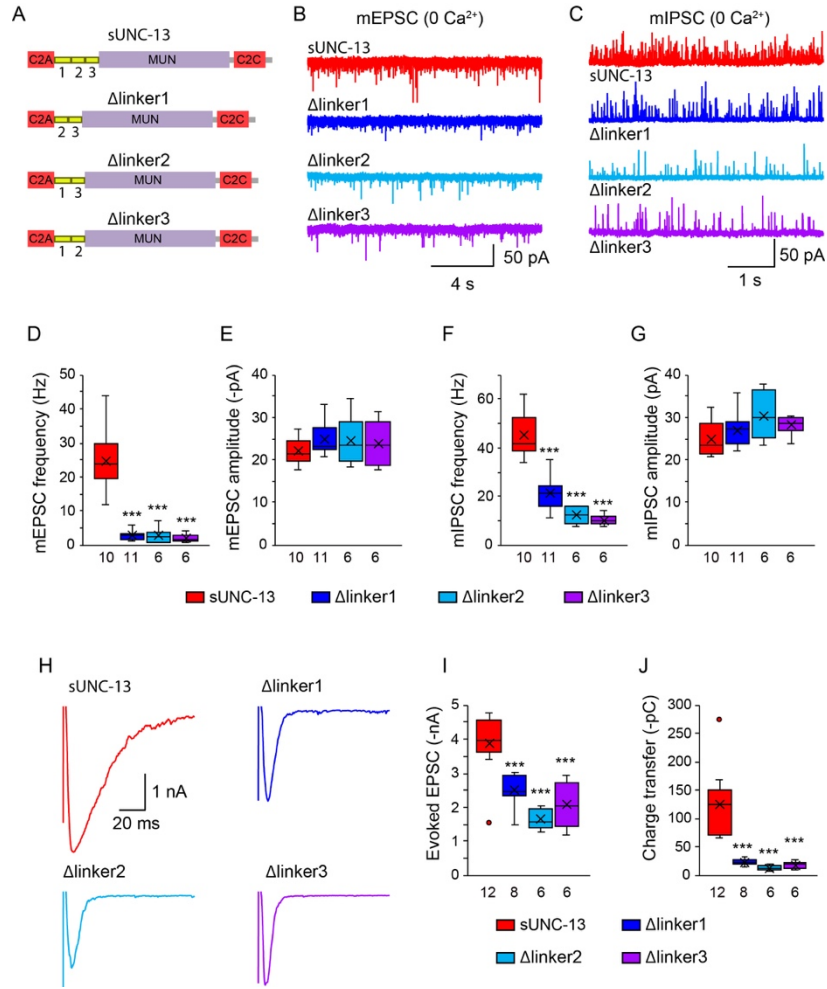

**Figure S6. The three small linkers are essential for sUNC-13 function. Related to Figure 5.** (A) Cartoon depicting the domain structure of sUNC-13, Δlinker1, Δlinker2, and Δlinker3. (B-G) Representative traces and boxplot of frequency and amplitude of mEPSCs and mIPSCs recorded from the indicated genotypes in 0mM Ca<sup>2+</sup>. (H-J) Representative traces and summary of the amplitude and charge transfer of the evoked EPSCs recorded from the indicated genotypes in 1mM Ca<sup>2+</sup>. Data are shown as box-and-whisker plots with the both median (line) and mean (cross) indicated (\*\*\*,  $p < 0.001$  when compared to the sUNC-13 rescue; one-way ANOVA test for data in E, F, G, one-way ANOVA following Kruskal-Wallis test for data in D, I, J). The number of worms analyzed for each genotype is indicated under each box.

**Figure S7**

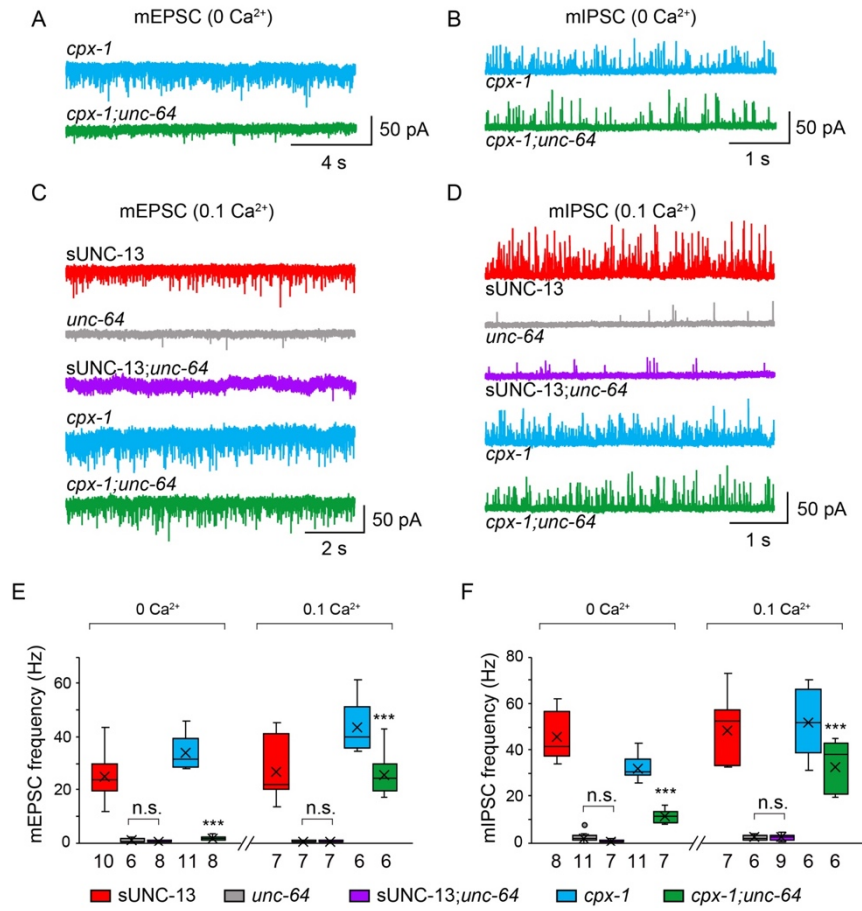

**Figure S7. Tonic release in *sUNC-13* rescue but not in *cpx-1* mutants is blocked when *unc-64*/syntaxin-1A is lacking. Related to Figure 7.** (A-D) Representative traces of the mEPSCs and mIPSCs recorded from the indicated genotypes in 0mM and 0.1mM  $Ca^{2+}$ . (E, F) Averaged frequencies of the mEPSC and mIPSC from the indicated genotypes. Data are shown as box-and-whisker plots with the both median (line) and mean (cross) indicated (\*\*\*,  $p < 0.001$  when compared to *sUNC-13;unc-64*; n.s., non-significant; one-way ANOVA). The number of worms analyzed for each genotype is indicated under each box.

Table S1. Summary of the electrophysiological data in this study. Related to Figure 1-7.

|                                  | Tonic release                 |                |                               |                |                               |                |                               |                | evoked EPSC     |              | RRP                                           | P <sub>rr</sub> |
|----------------------------------|-------------------------------|----------------|-------------------------------|----------------|-------------------------------|----------------|-------------------------------|----------------|-----------------|--------------|-----------------------------------------------|-----------------|
|                                  | mEPSC (0mM Ca <sup>2+</sup> ) |                | mEPSC (1mM Ca <sup>2+</sup> ) |                | mIPSC (0mM Ca <sup>2+</sup> ) |                | mIPSC (1mM Ca <sup>2+</sup> ) |                | Amplitude (-nA) | Charge (-pC) | Charge (-pC)                                  |                 |
|                                  | Frequency (Hz)                | Amplitude (pA) | Frequency (Hz)                | Amplitude (pA) | mIPSC (Hz)                    | Amplitude (pA) | mIPSC (Hz)                    | Amplitude (pA) |                 |              |                                               |                 |
| Wild type                        | 1.9 ± 0.2                     | 23.2 ± 1.6     | 43.5 ± 4.3                    | 23.9 ± 1.1     | 10.9 ± 1.1                    | 25.9 ± 1.1     | 42.5 ± 4.1                    | 22.5 ± 2.1     | 2.3 ± 0.2       | 20.6 ± 2.1   | 221 ± 23.1                                    | 0.09 ± 0.01     |
| <i>unc-13(s69)</i>               | 0.1 ± 0.01                    | 20.2 ± 3       | 0.5 ± 0.09                    | 21.1 ± 2.1     | 0.1 ± 0.01                    | 22.1 ± 4.1     | 0.6 ± 0.02                    | 21.5 ± 3.2     | 0.01 ± 0.01     | 0.05 ± 0.01  | 25.5 ± 7.1                                    | 0               |
| UNC-13L                          | 1.5 ± 0.4                     | 19.3 ± 1.9     | 43.4 ± 3.7                    | 23.9 ± 1.1     | 10.1 ± 0.9                    | 22.3 ± 2.2     | 38.1 ± 3.5                    | 22.4 ± 1.1     | 1.7 ± 0.1       | 15.4 ± 2.6   | 237 ± 25.4                                    | 0.06 ± 0.01     |
| UNC-13LΔX                        | 1.1 ± 0.2                     | 22.8 ± 0.9     | 39.1 ± 5.0                    | 22.2 ± 1.9     | 14.3 ± 0.5                    | 24.8 ± 1.5     | 44.9 ± 8.9                    | 24.9 ± 1.1     | 2.6 ± 0.2       | 26.6 ± 2.9   | 266 ± 47.4                                    | 0.1 ± 0.01      |
| UNC-13LΔC1                       | 2.2 ± 0.7                     | 19.3 ± 1.9     | 42.3 ± 4.9                    | 20.3 ± 0.8     | 18.8 ± 2.7                    | 24.7 ± 0.9     | 43.9 ± 5.4                    | 25.2 ± 1.3     | 2.1 ± 0.2       | 20.4 ± 2.6   | Ref. Michelassi et al. Ref. Michelassi et al. | n/a             |
| UNC-13LΔC2B                      | 2.8 ± 0.3                     | 20.9 ± 2.5     | 43.4 ± 3.3                    | 24.4 ± 0.8     | 25.8 ± 2.6                    | 25.7 ± 1.7     | 53.2 ± 4.2                    | 25.2 ± 1.3     | 2.7 ± 0.1       | 26.5 ± 1.9   |                                               |                 |
| UNC-13L(H696K)                   | 1.7 ± 0.3                     | 19.7 ± 3.0     | 36.3 ± 3.4                    | 20.8 ± 1.8     | 16.9 ± 1.2                    | 25.2 ± 1.0     | 44.3 ± 10.6                   | 26.0 ± 2.7     | 1.6 ± 0.2       | 14.7 ± 2.9   | n/a                                           | n/a             |
| UNC-13L(D3,4N)                   | 2.6 ± 0.6                     | 24.8 ± 1.9     | 41.6 ± 4.2                    | 22.7 ± 1.1     | 24.7 ± 4.6                    | 23.4 ± 0.4     | 39.1 ± 5.2                    | 20.9 ± 1.9     | 2.8 ± 0.1       | 31.3 ± 4.4   | n/a                                           | n/a             |
| UNC-13L(D3,4E)                   | 0.7 ± 0.06                    | 20.2 ± 1.5     | 46.9 ± 5.0                    | 24.7 ± 1.6     | 7.7 ± 0.9                     | 25.9 ± 2.0     | 42.8 ± 3.4                    | 31.1 ± 2.8     | 1.6 ± 0.2       | 8.3 ± 1.3    | n/a                                           | n/a             |
| UNC-13L(D1-5N)                   | 4.4 ± 0.5                     | 25.2 ± 2.2     | n/a                           | n/a            | 32.9 ± 1.3                    | 27.5 ± 0.7     | n/a                           | n/a            | n/a             | n/a          | n/a                                           | n/a             |
| UNC-13LΔCaM                      | 1.3 ± 0.3                     | 20.1 ± 3.1     | n/a                           | n/a            | 12.3 ± 1.6                    | 27.5 ± 2.1     | n/a                           | n/a            | n/a             | n/a          | n/a                                           | n/a             |
| UNC-13L(W593R)                   | 1.2 ± 0.4                     | 19.1 ± 2.5     | n/a                           | n/a            | 10.9 ± 1.7                    | 26.5 ± 3.8     | n/a                           | n/a            | n/a             | n/a          | n/a                                           | n/a             |
| sUNC-13                          | 24.7 ± 2.8                    | 22.1 ± 0.9     | 41.1 ± 2.2                    | 23.5 ± 0.9     | 45.3 ± 3.0                    | 24.9 ± 1.4     | 45.3 ± 3.8                    | 23.3 ± 1.0     | 3.9 ± 0.2       | 124.5 ± 17.0 | 241 ± 19.7                                    | 0.5 ± 0.07      |
| sUNC-13ΔLinker                   | 3.2 ± 0.6                     | 26.9 ± 2.0     | 41.0 ± 4.2                    | 24.0 ± 2.6     | 40.6 ± 3.2                    | 27.9 ± 1.4     | 41.9 ± 6.2                    | 24.5 ± 3.0     | 3.2 ± 0.2       | 34.6 ± 5.4   | 303 ± 31.8                                    | 0.11 ± 0.02     |
| sUNC-13ΔC2A                      | 4.1 ± 1.2                     | 23.6 ± 2.2     | 32.7 ± 3.8                    | 19.5 ± 0.8     | 12.2 ± 1.1                    | 21.4 ± 0.7     | 31.7 ± 2.2                    | 21.6 ± 0.8     | 2.9 ± 0.2       | 59.7 ± 6.9   | 262 ± 46.6                                    | 0.23 ± 0.02     |
| sUNC-13ΔLinker1                  | 2.8 ± 0.4                     | 24.7 ± 1.1     | 36.6 ± 3.5                    | 24.7 ± 1.0     | 21.2 ± 2.1                    | 27.0 ± 1.2     | 46.8 ± 3.9                    | 26.2 ± 1.3     | 2.5 ± 0.2       | 23.0 ± 2.0   | n/a                                           | n/a             |
| sUNC-13ΔLinker2                  | 2.7 ± 1.0                     | 24.6 ± 2.4     | 12.5 ± 2.9                    | 20.7 ± 1.2     | 12.3 ± 1.4                    | 30.5 ± 2.4     | 40.5 ± 4.0                    | 28.4 ± 1.7     | 1.7 ± 0.14      | 12.7 ± 2.0   | n/a                                           | n/a             |
| sUNC-13ΔLinker3                  | 2.1 ± 0.5                     | 23.8 ± 2.1     | 31.2 ± 2.3                    | 24.4 ± 1.2     | 10.2 ± 0.9                    | 28.2 ± 0.9     | 40.9 ± 3.1                    | 25.9 ± 1.1     | 2.1 ± 0.3       | 18.0 ± 2.8   | n/a                                           | n/a             |
| <i>unc-64</i>                    | 0.9 ± 0.3                     | 18.8 ± 2.3     | 6.4 ± 1.8                     | 15.5 ± 1.3     | 2.2 ± 0.6                     | 34.7 ± 2.4     | 38.5 ± 6.5                    | 36.5 ± 2.3     | 0.14 ± 0.05     | 1.4 ± 0.03   | 113 ± 15.8                                    | 0.009 ± 0.003   |
| UNC-64 rescue                    | 1.6 ± 0.5                     | 26.9 ± 2.2     | 35.2 ± 3.7                    | 22.8 ± 1.8     | 10.5 ± 0.8                    | 25.8 ± 1.4     | 46.3 ± 8.1                    | 26.3 ± 2.4     | 1.5 ± 0.2       | 12.6 ± 1.6   | 211 ± 25.7                                    | 0.06 ± 0.007    |
| sUNC-13; <i>unc-64</i>           | 0.6 ± 0.07                    | 18.4 ± 1.7     | 5.7 ± 1.1                     | 20.4 ± 1.5     | 0.7 ± 0.2                     | 22.3 ± 4.5     | 23.0 ± 5.3                    | 33.3 ± 2.5     | 0.15 ± 0.03     | 1.11 ± 0.03  | n/a                                           | n/a             |
| UNC-64(open) rescue              | 11.9 ± 1.4                    | 20.4 ± 1.0     | 48.9 ± 5.3                    | 25.1 ± 1.6     | 35.3 ± 2.7                    | 22.6 ± 0.9     | 54.4 ± 3.5                    | 26.1 ± 1.7     | 2.5 ± 0.13      | 35.7 ± 2.8   | 251 ± 29.6                                    | 0.14 ± 0.03     |
| sUNC-13;UNC-64(open)             | 14.9 ± 2.4                    | 27.0 ± 1.6     | 46.8 ± 5.5                    | 22.9 ± 1.7     | 27.5 ± 3.1                    | 23.2 ± 1.3     | 41.4 ± 4.2                    | 24.7 ± 1.6     | 3.2 ± 0.14      | 84.9 ± 14.1  | 285 ± 56.7                                    | 0.3 ± 0.05      |
| <i>cpx-1</i>                     | 33.8 ± 1.8                    | 17.1 ± 0.9     | 95.4 ± 6.5                    | 24.9 ± 1.3     | 31.9 ± 1.6                    | 22.6 ± 1.0     | 52.7 ± 3.9                    | 22.6 ± 0.7     | 0.23 ± 0.03     | 3.4 ± 0.6    | n/a                                           | n/a             |
| <i>cpx-1;unc-64</i>              | 1.7 ± 0.3                     | 21.0 ± 1.2     | 56.4 ± 1.9                    | 22.0 ± 0.6     | 11.5 ± 1.1                    | 24.3 ± 1.3     | 73.1 ± 6.4                    | 30.3 ± 1.9     | 0.17 ± 0.02     | 3.2 ± 0.5    | n/a                                           | n/a             |
| <i>tom-1</i>                     | 1.8 ± 0.3                     | 19.4 ± 1.3     | 45.8 ± 2.7                    | 23.4 ± 1.0     | 11.0 ± 1.3                    | 24.6 ± 0.9     | 42.9 ± 4.7                    | 26.3 ± 2.3     | 3.8 ± 0.3       | 109.8 ± 18.7 | 310.1 ± 31.3                                  | 0.36 ± 0.06     |
| <i>tom-1;unc-64</i>              | 0.65 ± 0.07                   | 30.7 ± 3.9     | 7.3 ± 0.8                     | 19.8 ± 2.2     | 0.98 ± 0.1                    | 27.6 ± 4.0     | 15.3 ± 3.9                    | 29.7 ± 3.1     | 0.78 ± 0.2      | 13.6 ± 4.5   | n/a                                           | n/a             |
| sUNC-13; <i>tom-1</i>            | 23.8 ± 3.2                    | 19.1 ± 0.7     | n/a                           | n/a            | 32.2 ± 4.0                    | 25.1 ± 1.6     | n/a                           | n/a            | 3.1 ± 0.2       | 107.4 ± 15.9 | n/a                                           | n/a             |
| UNC-64; <i>unc-13(s69)</i>       | n/a                           | n/a            | 0.6 ± 0.09                    | 20.9 ± 2.5     | n/a                           | n/a            | 0.4 ± 0.04                    | 23.2 ± 3.5     | 0.015 ± 0.01    | 0.055 ± 0.02 | n/a                                           | n/a             |
| UNC-64(open); <i>unc-13(s69)</i> | n/a                           | n/a            | 1.3 ± 0.4                     | 21.0 ± 1.9     | n/a                           | n/a            | 2.9 ± 0.7                     | 22.5 ± 1.3     | 0.06 ± 0.02     | 0.34 ± 0.13  | n/a                                           | n/a             |

All data were collected from 3 independent experiments to ensure the observed phenotypes were replicable. Data are presented as the mean ± SEM.
