# Supplementary material for: A Hyperactive Form of unc-13 Enhances Ca2+ Sensitivity and Synaptic Vesicle Release Probability in C. elegans
Source: PubMed Central journal article supplement — Cell Rep. Author manuscript; Available in PMC 2019 Oct 7. (PMC6779330; doi:10.1016/j.celrep.2019.08.018), 2019-09-10
Supplement: NIHMS1539599-supplement-2.pdf [file NIHMS1539599-supplement-2.pdf]

## A Hyperactive Form of *unc-13* Enhances $\text{Ca}^{2+}$ Sensitivity and Synaptic Vesicle Release Probability in *C. elegans*

### Graphical Abstract

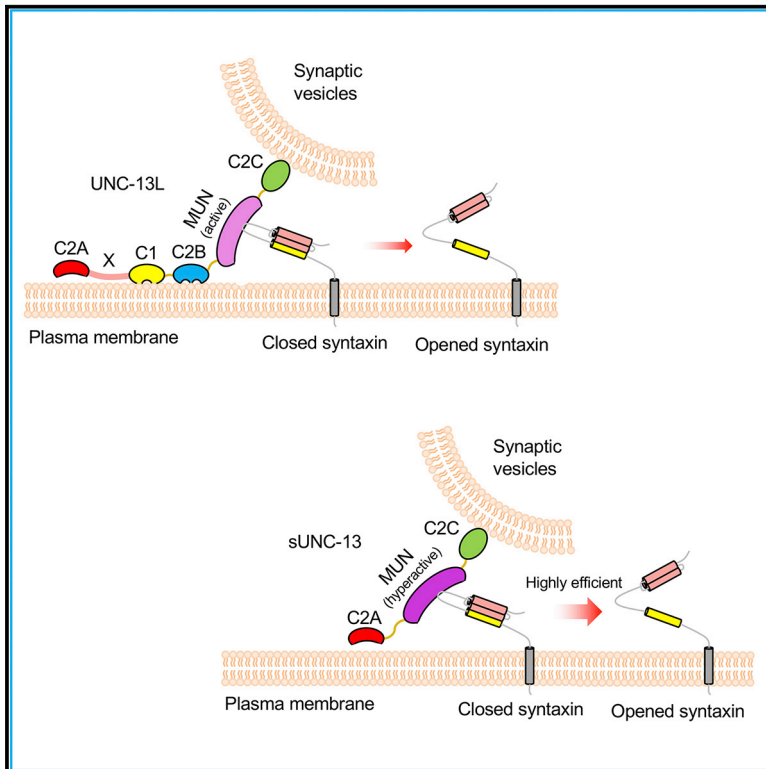

### Authors

Lei Li, Haowen Liu, Qi Hall, Wei Wang, Yi Yu, Joshua M. Kaplan, Zhitao Hu

### Correspondence

kaplan@molbio.mgh.harvard.edu (J.M.K.),  
z.hu1@uq.edu.au (Z.H.)

### In Brief

Li et al. identify three domains in UNC-13L that inhibit neurotransmitter release. Removal of the three inhibitory domains produces a hyperactive UNC-13 that dramatically increases  $\text{Ca}^{2+}$  sensitivity and release probability of vesicle exocytosis by opening syntaxin in a highly efficient manner.

### Highlights

- UNC-13L exhibits both facilitatory and inhibitory regulation in synaptic transmission
- Removing all inhibitory domains in UNC-13L produces a hyperactive UNC-13
- Synaptic recovery is accelerated in sUNC-13 transgenic animals
- sUNC-13 increases release probability by opening syntaxin in a highly efficient manner

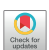

# A Hyperactive Form of *unc-13* Enhances $\text{Ca}^{2+}$ Sensitivity and Synaptic Vesicle Release Probability in *C. elegans*

Lei Li,<sup>1,5</sup> Haowen Liu,<sup>1,5</sup> Qi Hall,<sup>2,3</sup> Wei Wang,<sup>1</sup> Yi Yu,<sup>1</sup> Joshua M. Kaplan,<sup>2,3,4,\*</sup> and Zhitao Hu<sup>1,6,\*</sup><sup>1</sup>Queensland Brain Institute, Clem Jones Centre for Ageing Dementia Research (CJCADR), The University of Queensland, Brisbane, QLD 4072, Australia<sup>2</sup>Department of Molecular Biology, Massachusetts General Hospital, Boston, MA 02114, USA<sup>3</sup>Department of Neurobiology, Harvard Medical School, Boston, MA 02115, USA<sup>4</sup>Program in Neuroscience, Harvard Medical School, Boston, MA 02115, USA<sup>5</sup>These authors contributed equally<sup>6</sup>Lead Contact\*Correspondence: [kaplan@molbio.mgh.harvard.edu](mailto:kaplan@molbio.mgh.harvard.edu) (J.M.K.), [z.hu1@uq.edu.au](mailto:z.hu1@uq.edu.au) (Z.H.)<https://doi.org/10.1016/j.celrep.2019.08.018>

## SUMMARY

Munc13 proteins play several roles in regulating short-term synaptic plasticity. However, the underlying molecular mechanisms remain largely unclear. Here we report that *C. elegans* UNC-13L, a Munc13-1 ortholog, has three domains that inhibit synaptic vesicle (SV) exocytosis. These include the X (sequence between C2A and C1), C1, and C2B domains. Deleting all three inhibitory domains produces a hyperactive UNC-13 (sUNC-13) that exhibits dramatically increased neurotransmitter release,  $\text{Ca}^{2+}$  sensitivity of release, and release probability. The vesicular pool in *unc-13* mutants rescued by sUNC-13 exhibits a faster synaptic recovery and replenishment rate, demonstrating an important role of sUNC-13 in regulating synaptic plasticity. Analysis of double mutants suggests that sUNC-13 enhances tonic release by increasing the open probability of UNC-64/syntaxin-1A, whereas its effects on evoked release appear to be mediated by additional functions, presumably by further regulating the activity of the assembled soluble *N*-ethylmaleimide-sensitive factor activating protein receptor (SNARE) complex.

## INTRODUCTION

Communication between neurons is determined by the release of neurotransmitters from synaptic vesicles (SVs) at presynaptic nerve terminals. SV release is a complicated and tightly regulated process in which SVs undergo several steps to become fusion competent, including docking and priming (Südhof, 2004; Südhof and Rizo, 2011). Depolarization of the presynaptic plasma membrane leads to opening of voltage-gated  $\text{Ca}^{2+}$  channels, resulting in  $\text{Ca}^{2+}$  influx, which, in turn, triggers SV fusion (Borst and Sakmann, 1996). Synaptic efficacy is regulated by many aspects of SV exocytosis, with the release probability

( $P_{vr}$ ) being one of the most essential parameters regulating synaptic strength, which is thought to underlie learning and memory formation in the nervous system (Malenka, 1994; Fioravante and Regehr, 2011). The release probability is mainly determined by the fusogenicity of SVs in the readily releasable vesicle pool (RRP). A large number of factors are involved in the regulation of the fusogenicity of SVs, such as the function of  $\text{Ca}^{2+}$  channels, the status of the fusion machinery, and the coupling of SVs to  $\text{Ca}^{2+}$  entry (Borst and Sakmann, 1999; Meinrenken et al., 2003; Catterall and Few, 2008).

At single synapses, release probability is assessed at both entire synapse and single SV levels (Gerber et al., 2008; Körber and Kuner, 2016). The  $P_{vr}$  of the entire synapse is determined by the ratio of release evoked by an action potential to the one that occurs when the entire RRP is released. The  $P_{vr}$  of individual SVs is typically determined by the frequency of spontaneous SV fusion. In this study, unless specifically designated, release probability represents the  $P_{vr}$  of both the entire synapse and single SVs. In the past two decades, a number of synaptic proteins have been identified for their essential roles in regulating SV release (Südhof and Rizo, 2011). It is believed that the soluble *N*-ethylmaleimide-sensitive factor activating protein receptor (SNARE) complex, consisting of synaptobrevin/vesicle-associated membrane protein (VAMP) on SVs and syntaxin and SNAP-25 on the plasma membrane, comprises the minimal machinery for SV fusion (Weber et al., 1998). Modulation of the SNARE complex is tightly linked to SV release and release probability (Weber et al., 2010). Several proteins, such as complexin, synaptotagmin, and tomosyn, regulate SV release through binding interactions with the SNARE core complex. Intriguingly, these proteins have been reported to regulate the release probability of entire synapses and single SVs differentially. For example, a dramatic increase in spontaneous release has been reported in synaptotagmin-1 or complexin-1 knockout neurons, resulting in an increased  $P_{vr}$  of single SVs, whereas the  $P_{vr}$  of entire synapses is largely decreased in these neurons (Huntwork and Littleton, 2007; Maximov et al., 2009; Shin et al., 2009; Xu et al., 2009; Martin et al., 2011). In *tom-1* mutants, the  $P_{vr}$  of entire synapses is increased, whereas the  $P_{vr}$  of single SVs remains

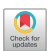

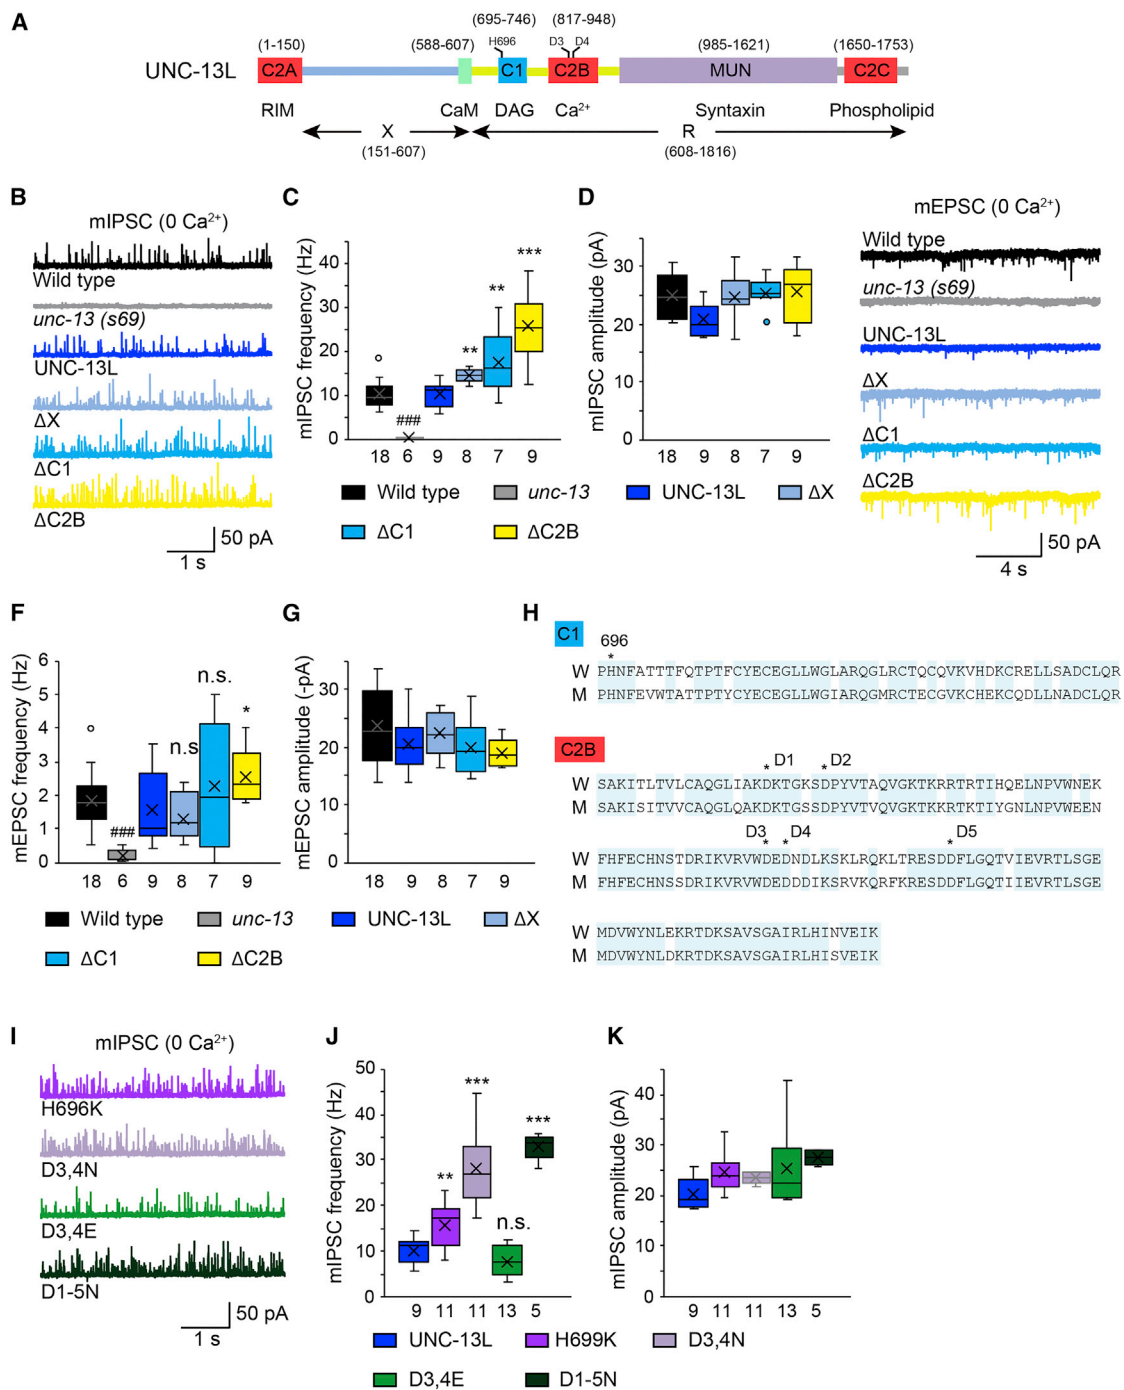

**Figure 1. The X, C1, and C2B Domains in UNC-13L Inhibit Tonic Release**

Miniature EPSCs were recorded from the body wall muscle of adult worms in a 0 mM Ca<sup>2+</sup> solution.

(A) Cartoon depicting the domain structure of UNC-13L.

(B) Representative mIPSC traces from the indicated genotypes.

(C and D) Quantification of the frequency (C) and amplitude (D) of the mIPSCs from the same genotypes as in (B).

(E) Representative mEPSC traces from the indicated genotypes.

(F and G) Average of the frequency (F) and amplitude (G) of the mEPSCs from the same genotypes as in (E).

(H) Sequence alignment of the C1 and C2B domains between worm *unc-13* and rat Munc13-1. Identical residues are highlighted (blue). The histidine (H) that is essential for DAG binding in the C1 domain and the five aspartates (D1–D5) that bind Ca<sup>2+</sup> in the C2B domain are indicated with stars.

(I) Representative mIPSC traces from the indicated genotypes.

(legend continued on next page)

unchanged (Gracheva et al., 2006; McEwen et al., 2006; Chen et al., 2011; Liu et al., 2018). These observations indicate that the release probability of entire synapse and single SVs are regulated by distinct synaptic mechanisms.

As one of the SNARE-binding proteins, Munc13-1 and its homologs are involved in SV docking, priming, and post-priming  $\text{Ca}^{2+}$ -triggered exocytosis (Aravamudan et al., 1999; Augustin et al., 1999; Richmond et al., 1999; Guan et al., 2008; Chen et al., 2013; Camacho et al., 2017). Munc13 proteins possess multiple functional domains that have different binding partners (Brose et al., 1995; Koch et al., 2000). Of the Munc13 proteins, Munc13-1 and Munc13-2 have been implicated in the regulation of synaptic plasticity (Basu et al., 2007; Chen et al., 2013). However, despite the work done on the Munc13 proteins, the molecular mechanisms by which they regulate synaptic plasticity remain largely unclear. In the present study, we investigated the functional roles of the individual domains in UNC-13L, a Munc13-1 homolog in *C. elegans*. We identified three different domains (X, C1, and C2B) that inhibit UNC-13-mediated synaptic transmission. Removing all three domains in UNC-13L produced a super-UNC-13 that greatly altered many aspects of synaptic transmission, including increased  $\text{Ca}^{2+}$  sensitivity and release probability, decreased synaptic depression, and faster synaptic recovery. We further demonstrated that the super-UNC-13 enhanced the release probability by activating UNC-64/syntaxin-1A, presumably by opening syntaxin in a highly efficient manner, as well as regulating the opened syntaxin activity during SNARE assembly. Our study therefore provides significant molecular insight into the role of UNC-13 in regulating synaptic transmission and plasticity.

## RESULTS

### Three UNC-13L Domains Inhibit Tonic Release

Unlike the action potential-evoked release found in mammalian synapses, the *C. elegans* neuromuscular junction (NMJ) exhibits graded synaptic transmission, with endogenous neural activity continuously driving SV fusion. This type of SV release is therefore termed tonic release (Hobson et al., 2011). Despite the difference in definition, tonic release at the *C. elegans* NMJ requires similar regulatory mechanisms as for spontaneous release, which occurs in the mouse CNS (Augustin et al., 1999; Richmond et al., 1999; Maximov et al., 2009; Martin et al., 2011). Moreover, we recently found that tonic release can still occur in the absence of extracellular  $\text{Ca}^{2+}$  at GABAergic and cholinergic synapses (Liu et al., 2018). This therefore provides a means to study tonic release under low endogenous activity.

We examined the functions of individual UNC-13L domains in tonic release. Both miniature excitatory and inhibitory postsynaptic currents (mEPSCs and mIPSCs, respectively) were recorded from *unc-13* mutants rescued by full-length UNC-13L or truncated forms lacking specific domains (Figure 1A). Tonic release was completely eliminated in the *unc-13* null mutants

(s69) in 0 mM  $\text{Ca}^{2+}$ , and this defect was fully rescued by transgenes expressing an UNC-13L cDNA (Figures 1B and 1C). Interestingly, we found that UNC-13L mutants lacking single N-terminal domains (i.e.,  $\Delta X$ ,  $\Delta C1$ , and  $\Delta C2B$  mutants) had a significantly increased mIPSC frequency (Figures 1B and 1C), indicating that these domains inhibit tonic release. The mIPSC amplitude was unchanged in all three deletion mutants (Figure 1D), suggesting that postsynaptic receptor abundance and function were unaffected.

In general, deleting these domains had smaller effects on mEPSCs than those observed for mIPSCs. Deleting the X or the C1 domain failed to cause a detectable change (Figures 1E and 1F), whereas deleting the C2B domain led to a significant increase in mEPSC frequency (Figure 1F), indicating stronger inhibition of the C2B domain on tonic release. This led us to ask whether the weaker phenotype in mEPSCs resulted from a functional defect of the postsynaptic receptors at cholinergic synapses under  $\text{Ca}^{2+}$ -free conditions. To test this, we performed acetylcholine (ACh) puff experiments in the presence or absence of extracellular  $\text{Ca}^{2+}$  in wild-type animals. A short pulsed application of ACh (0.5 M, 100 ms) onto the body wall muscle elicited a large current in a 1 mM  $\text{Ca}^{2+}$  bath solution, whereas the current was reduced by 50% in a 0 mM  $\text{Ca}^{2+}$  solution (Figures S1A and S1B). In contrast, puffing  $\gamma$ -aminobutyric acid (GABA; 0.5 M, 100 ms) onto the body wall muscle in 0 mM  $\text{Ca}^{2+}$  produced a current with a similar size as that obtained in 1 mM  $\text{Ca}^{2+}$  (Figures S1C and S1D). These results demonstrate that the channel conductance of the postsynaptic receptors is decreased at cholinergic synapses in the absence of  $\text{Ca}^{2+}$ , which may cause a greater variation in the mEPSCs recorded under the same condition. Therefore, changes in mEPSC frequency may be difficult to see in some cases.

### Mutations in the C1 and C2B Domains Mimic the Inhibitory Functions

Despite our mEPSC results, our mIPSC findings clearly showed that the X, C1, and C2B domains inhibit tonic release. Prior studies identified key residues in the C1 and C2B domains that affect synaptic transmission (Lou et al., 2008; Shin et al., 2010; Michelassi et al., 2017). A point mutation in the Munc13-1 C1 domain (H567K) abolishes diacylglycerol (DAG)/phorbol ester binding but leads to increased spontaneous release in the calyx of Held, suggesting increased Munc13-1 function (Basu et al., 2007). Sequence alignment showed that the histidine residue is deeply conserved in other Munc13 isoforms as well as in the two *unc-13* isoforms in *C. elegans* (H696 in UNC-13L; Figure 1H; Hu et al., 2013). We found that the *unc-13* mutants rescued by UNC-13L(H696K) exhibited a significantly higher mIPSC frequency that was comparable with that following UNC-13L $\Delta C1$  rescue in 0 mM  $\text{Ca}^{2+}$  (Figures 1I and 1J), indicating that the H696K mutation in UNC-13L functionally mimics the C1 deletion.

The C2B domain is characterized by  $\text{Ca}^{2+}$  and phospholipid binding properties (Shin et al., 2010). It has been reported that

(J and K) Quantification of the frequency (J) and amplitude (K) of the mIPSCs from the same genotypes as in (I).

Data are presented as box-and-whisker plots, with both the median (line) and mean (cross) indicated. ### $p < 0.001$  compared with the wild type; \* $p < 0.05$ , \*\* $p < 0.01$ , \*\*\* $p < 0.001$  compared with UNC-13L rescue; n.s., non-significant compared with UNC-13L rescue; one-way ANOVA test for the data in (D) and (G); one-way ANOVA following Kruskal-Wallis test for the data in (C), (F), (J), and (K). The number of worms analyzed for each genotype is indicated under each box.



the Munc13 C2B domain is an activity-dependent  $\text{Ca}^{2+}$  regulator of synaptic exocytosis (Shin et al., 2010). Further studies in *C. elegans* have demonstrated that deleting C2B in UNC-13L significantly increases stimulus-evoked EPSCs (evoked EPSCs) (Michelassi et al., 2017). The C2B domain possesses five conserved aspartates, two of which are located in loop 1, with the other three being located in loop 3 (Figure 1H). These residues are essential for changing the structure of the C2B domain after binding to  $\text{Ca}^{2+}$  has occurred (Shin et al., 2010). Prior studies demonstrated that replacing the calcium-binding aspartate residues in loop 3 of C2B with asparagines (D3,4N) mimics the  $\text{Ca}^{2+}$ -liganded state, whereas the corresponding glutamate substitutions (D3,4E) mimic the  $\text{Ca}^{2+}$ -free state. Analysis of these mutants has revealed that calcium binding to C2B promotes membrane binding, increasing the evoked EPSC amplitude (Michelassi et al., 2017). Here we examined whether these mutations alter tonic release in 0 mM  $\text{Ca}^{2+}$ . As shown in Figures 1I and 1J, a significant increase in mIPSC frequency was observed in *unc-13* mutants rescued by UNC-13L(D3,4N), with the D3,4E mutations causing a slight but not significant decrease in mIPSC frequency. Mutating all five aspartates to asparagines (D1-5N) did not produce a further increase in mIPSC frequency. Moreover, the mIPSC frequency in the UNC-13L(D3,4N) rescue closely resembled that in the UNC-13L $\Delta$ C2B rescue (Figures 1C and 1J). Collectively, these results indicate that unliganded C2B inhibits tonic release and that this inhibition is relieved by calcium binding.

A conserved calmodulin (CaM) binding motif was found in the X domain (Figure S2A). Calmodulin binding to Munc13 is required for short-term synaptic plasticity at the calyx of Held (Lipstein et al., 2013). We next tested whether calmodulin binding to UNC-13L accounted for the X domain's inhibitory function. Co-immunoprecipitation results indicate that calmodulin binds to the N-terminal domain of UNC-13L and that this binding was disrupted by a point mutation in the calmodulin domain (W593R) (Figures S2A and S2B). The mIPSC rate exhibited by wild-type UNC-13L rescue was indistinguishable from that observed in *unc-13* mutants rescued by UNC-13L( $\Delta$ CaM) or UNC-13L(W593R) (Figures S2C–S2E). These results indicate that calmodulin binding is not required for the inhibitory function of the X domain.

### The Probability of Tonic Release Is Greatly Increased by Simultaneously Removing All Three Inhibitory Domains in UNC-13L

We next wondered whether the inhibitory effect of the X, C1, and C2B domains on tonic mEPSCs could be seen more easily by deleting all three domains simultaneously. To test this, a truncated UNC-13L lacking these domains ( $\Delta$ X $\Delta$ C1 $\Delta$ C2B) was constructed (Figure 2A). As shown in Figures 2B and 2D, a 20-fold increase in mEPSC frequency was observed in *unc-13* mutants rescued by UNC-13L( $\Delta$ X $\Delta$ C1 $\Delta$ C2B). Similarly, triple deletion of the X, C1, and C2B domains quadrupled the mIPSC frequency (Figures 2C and 2F). The cumulative probabilities for the interevent intervals of both mEPSCs and mIPSCs were strongly shifted when these three domains were lacking (Figures 2H and 2I). These results demonstrate strong inhibition of tonic release by the three domains. No difference in the amplitude of the tonic

release was observed between UNC-13L and the triple deletion, suggesting that the highly increased tonic release frequency arises from a presynaptic mechanism. It is worth noting that the UNC-13L( $\Delta$ X $\Delta$ C1 $\Delta$ C2B) mEPSC and mIPSC rates in 0 mM  $\text{Ca}^{2+}$  exceeded those of all previously described mutants in which tonic release is inhibited. Our results therefore indicate that simultaneously deleting all three inhibitory domains leads to a super-UNC-13 function (hereafter termed sUNC-13).

The finding that mEPSCs and mIPSCs were increased in 0 mM  $\text{Ca}^{2+}$  by sUNC-13 indicates an enhancement of the probability of tonic release. To confirm this, we analyzed the  $\text{Ca}^{2+}$  dependence of tonic release by recording both mEPSCs and mIPSCs in various  $\text{Ca}^{2+}$  concentrations. As depicted in Figures 2J and 2K, raising the extracellular  $\text{Ca}^{2+}$  concentration from 0 mM to 0.05 mM, 0.1 mM, and 1 mM significantly enhanced the mEPSC and mIPSC frequencies in wild-type animals, suggestive of a strong  $\text{Ca}^{2+}$  dependence of tonic release. The mEPSC and mIPSC frequencies in sUNC-13 rescue animals were significantly higher than those in wild-type animals at low  $\text{Ca}^{2+}$  levels (0.05 mM and 0.1 mM), demonstrating an increase in the probability of tonic release. Moreover, the mEPSC and mIPSC frequencies in sUNC-13 rescue animals at both 0.05 mM and 0.1 mM  $\text{Ca}^{2+}$  were indistinguishable from those in 0 mM  $\text{Ca}^{2+}$ , indicating strongly increased  $\text{Ca}^{2+}$  sensitivity. The decay of the mEPSCs and mIPSCs in sUNC-13 worms were also comparable with those in wild-type and UNC-13L rescue animals, indicating that the increased release probability does not lead to a change in the kinetics of single SV fusion (Figures 2L and 2M). It should be noted that the mEPSCs and mIPSCs in 1 mM  $\text{Ca}^{2+}$  were comparable between sUNC-13 rescue and UNC-13L rescue (Figures 2J and 2K). In fact, despite the obvious inhibitory effect of the X, C1, and C2B domains on tonic release in 0 mM  $\text{Ca}^{2+}$ , we did not observe changes in tonic release rescued by UNC-13L lacking single inhibitory domains or carrying point mutations (histidine-to-lysine mutation [HK] and aspartate-to-asparagine mutation [DN]) in 1 mM  $\text{Ca}^{2+}$  (Figure S3). These results demonstrate that sUNC-13 increases the release probability of single SVs in low  $\text{Ca}^{2+}$  by enhancing the  $\text{Ca}^{2+}$  sensitivity of SV exocytosis.

### Stimulus-Evoked Release, but Not Priming, Is Markedly Increased by sUNC-13

We next examined the functional role of sUNC-13 in evoked neurotransmitter release by recording stimulus-evoked EPSCs from the body wall muscle. Compared with UNC-13L, evoked EPSCs mediated by sUNC-13 were dramatically increased, with a 3-fold increase in amplitude and a 10-fold increase in charge transfer (Figures 3A–3C). Kinetic analysis of the evoked EPSCs mediated by sUNC-13 revealed a significant increase in rise time (20%–80%) and a large increase in decay compared with those rescued by UNC-13L. These results demonstrate that evoked neurotransmitter release is strongly inhibited by the X, C1, and C2B domains. Increased evoked EPSCs have also been observed in *unc-13* mutants rescued by UNC-13L with single domain deletions (Figure S4; Michelassi et al., 2017). However, the increases in the amplitude, charge transfer, and decay caused by the single domain deletions were far smaller than those observed in sUNC-13 rescue. The decay of the mEPSCs rescued by sUNC-13 was indistinguishable from

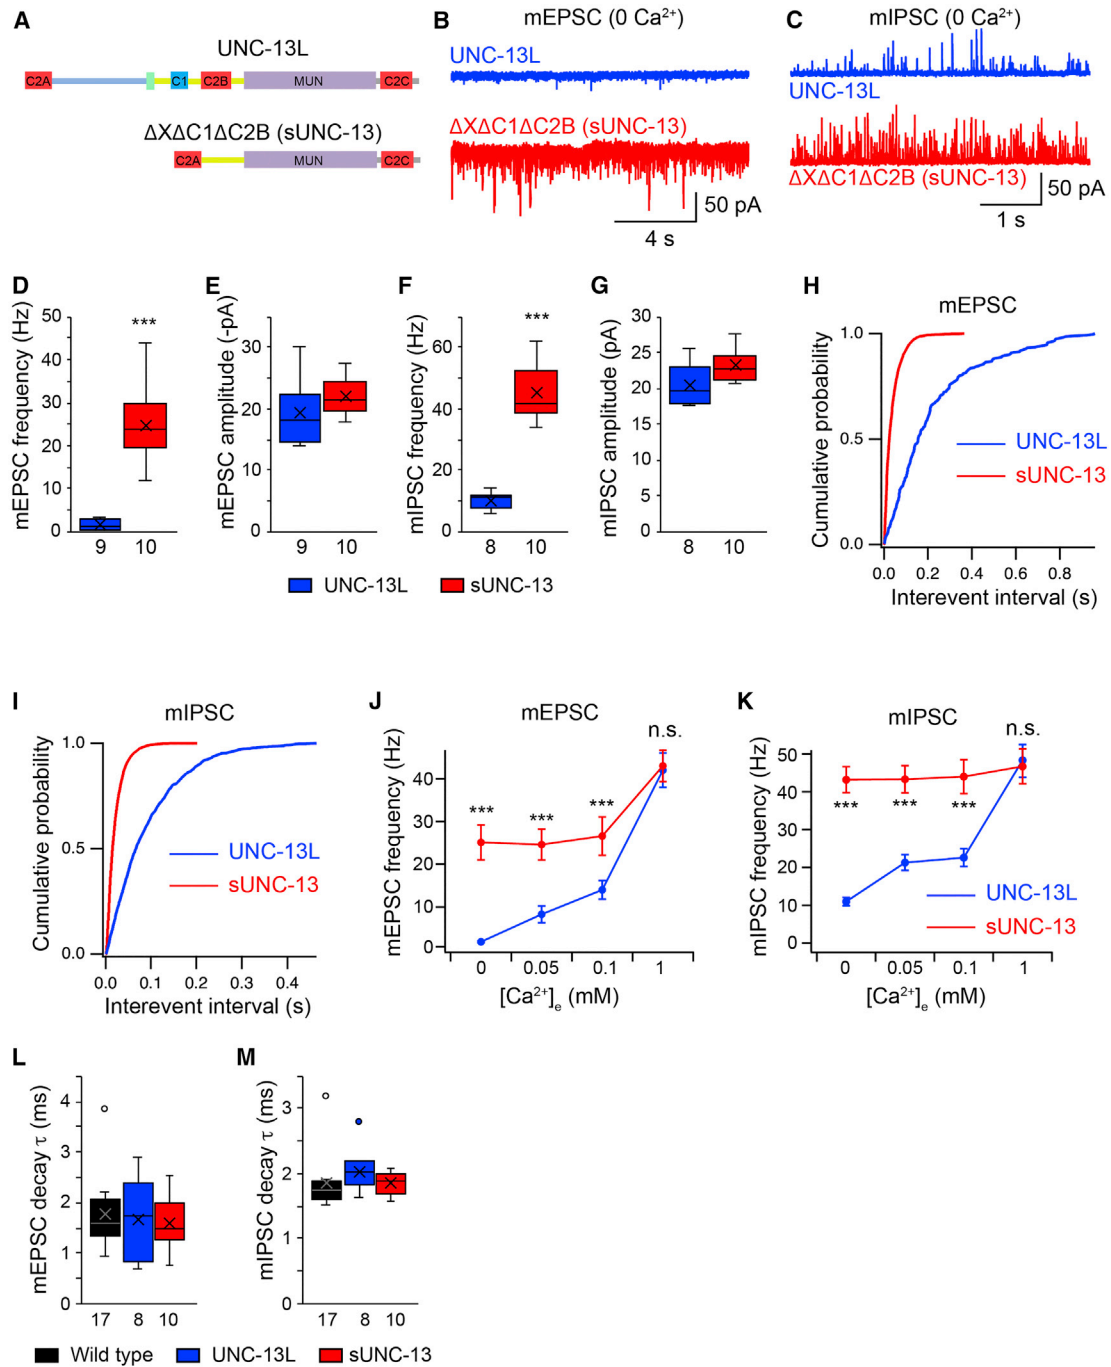

**Figure 2. UNC-13L Lacking the XC1C2B Domains Increases Tonic Release**

(A) Domain structure of full-length UNC-13L and UNC-13L $\Delta$ X $\Delta$ C1 $\Delta$ C2B (i.e., sUNC-13).

(B and C) Representative mEPSC (B) and mIPSC (C) traces recorded from *unc-13* mutants rescued by UNC-13L or UNC-13L $\Delta$ X $\Delta$ C1 $\Delta$ C2B in 0 mM  $Ca^{2+}$ .

(D–G) Boxplots of mEPSC/mIPSC frequency and amplitude from the indicated genotypes.

(H and I) Cumulative probability distributions of the interevent intervals of the mEPSCs (H) and mIPSCs (I) in UNC-13L and sUNC-13 rescue.

(J and K) Quantification of the mEPSC (J) and mIPSC (K) frequencies at various  $Ca^{2+}$  levels (0, 0.05, 0.1, and 1 mM) from *unc-13* mutants rescued by UNC-13L (blue) and sUNC-13 (red).

(L and M) Quantification of the decay of the averaged mEPSCs (L) and mIPSCs (M).

Data in (J) and (K) are presented as mean  $\pm$  SEM, and all other data are shown as box-and-whisker plots with the median (line) and mean (cross) indicated. \*\*\* $p$  < 0.001 compared with UNC-13L rescue; Mann-Whitney test for data in (D) and (G); Student's  $t$  test for data in (E) and (F); one-way ANOVA test for (L) and (M). The number of worms analyzed for each genotype is indicated under each box.

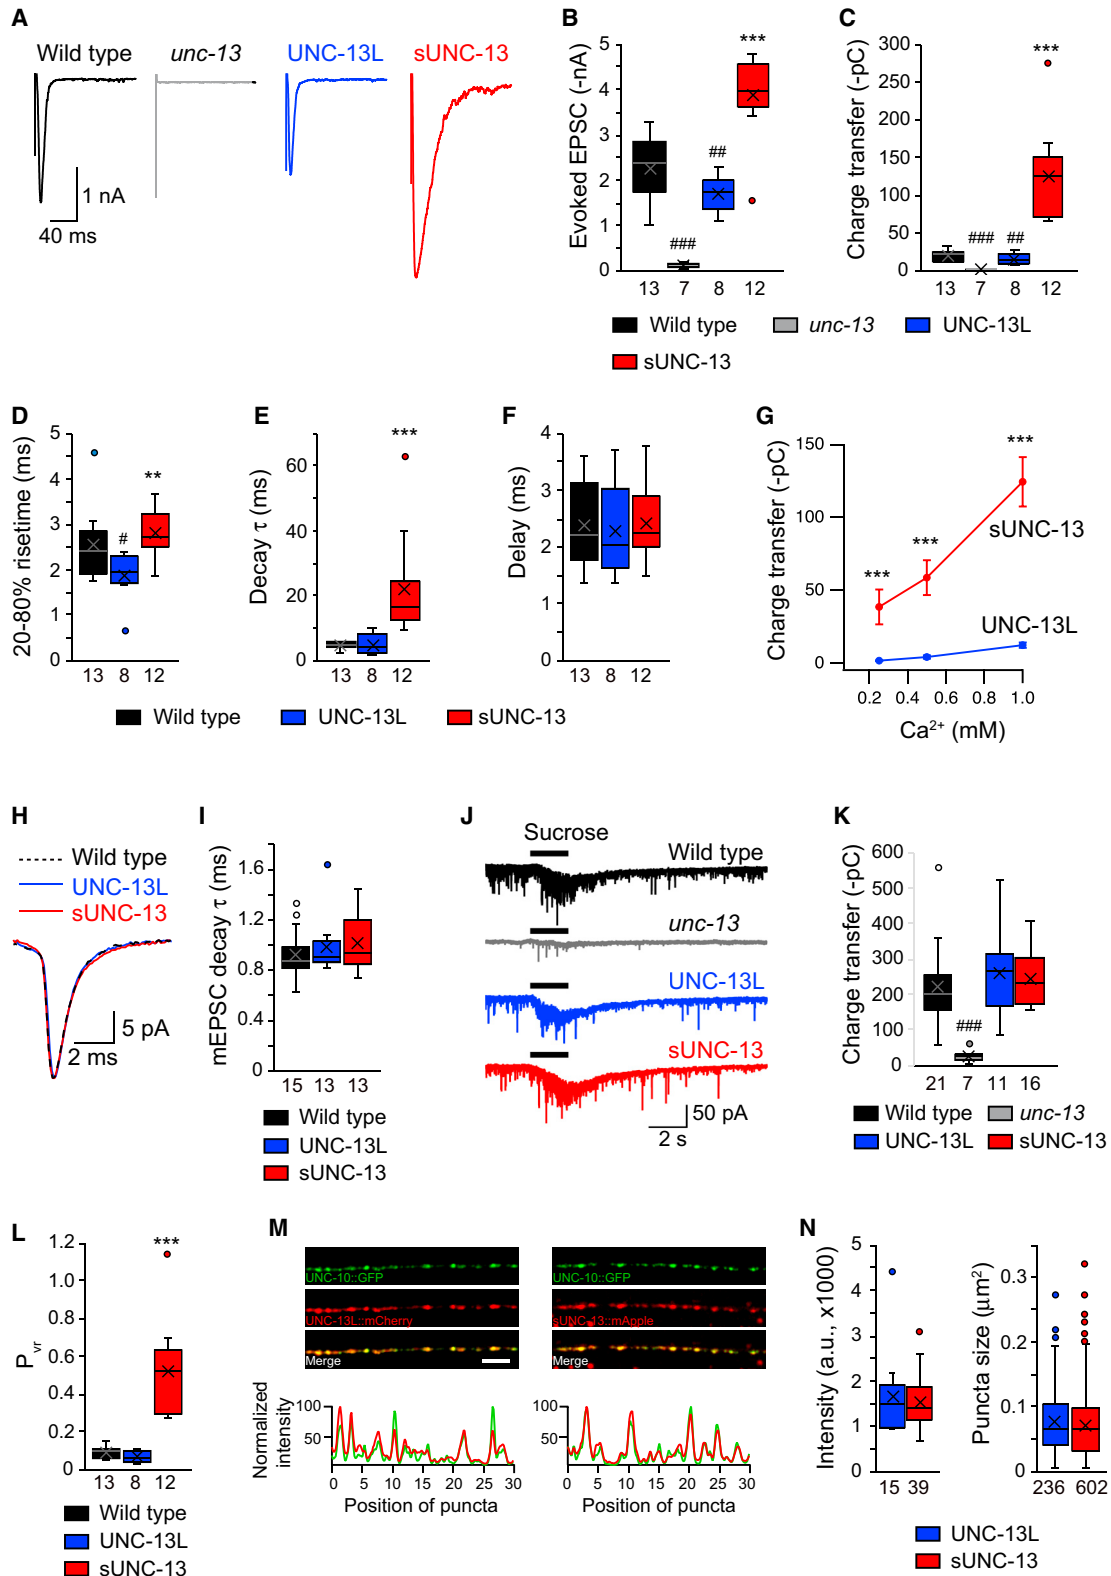

**Figure 3. sUNC-13 Increases Evoked Neurotransmitter Release without Changing the RRP**

(A) Example traces of stimulus-evoked EPSCs recorded in 1 mM Ca<sup>2+</sup> from wild-type (black), UNC-13L rescue (blue), and sUNC-13 rescue (red) animals. (B–F) Quantification of the evoked EPSC amplitude (B), charge transfer (C), 20%–80% rise time (D), decay (E), and delay (F) from the same genotype as in (A). (legend continued on next page)

that of mEPSCs rescued by UNC-13L (Figures 3H and 3I), suggesting that the slower decay of sUNC-13-mediated evoked EPSCs was not due to a change in the decay of the mEPSCs.

To assess the  $\text{Ca}^{2+}$  dependence of evoked release, we assessed the evoked EPSCs mediated by UNC-13L or sUNC-13 in 0.25, 0.5, and 1 mM  $\text{Ca}^{2+}$ . Our results revealed that sUNC-13 rescue produced larger evoked EPSCs than UNC-13L rescue at all  $\text{Ca}^{2+}$  concentrations tested (Figure 3G). The increase in evoked charge transfer mediated by sUNC-13 was even greater at low  $\text{Ca}^{2+}$  concentrations (20-fold in 0.25 mM  $\text{Ca}^{2+}$  and 10-fold in 1 mM  $\text{Ca}^{2+}$ ). These results, together with our observations in relation to tonic release, demonstrate that sUNC-13 dramatically enhances the  $\text{Ca}^{2+}$  sensitivity of SV exocytosis.

To examine whether the increase in evoked EPSCs following sUNC-13 rescue was caused by an increase in SV priming, we estimated the size of the RRP by measuring the synaptic charge evoked by hypertonic sucrose (1 M, 2 s; Rosenmund and Stevens, 1996). Using this assay, SV priming was nearly eliminated in *unc-13* mutants and restored by expressing full-length UNC-13L in all neurons (Figure 3J), consistent with previous reports (McEwen et al., 2006; Hu et al., 2013; Zhou et al., 2013). However, the sucrose-evoked currents rescued by sUNC-13 were comparable with those rescued by UNC-13L (Figure 3K). Thus, sUNC-13 did not alter SV priming, implying that the dramatically increased tonic and evoked release reflect sUNC-13 stimulation of a post-priming aspect of SV exocytosis. Consequently, the  $P_{vr}$  of the entire synapses, calculated by the ratio of the charge transfer of evoked EPSCs to the averaged charge transfer in sucrose responses (i.e., the RRP), was greatly increased by sUNC-13 (Figure 3L).

To determine whether deleting the three inhibitory domains in UNC-13L alters its synaptic localization, we examined the colocalization of sUNC-13 with UNC-10/RIM, an active zone protein. Our results revealed that UNC-13L (tagged with mApple) displayed good colocalization with UNC-10/RIM (tagged with GFP) (Figure 3M, left). A high degree of colocalization was also observed between sUNC-13 (tagged with mApple) and UNC-10/RIM (Figure 3M, right), indicating that the inhibitory domains in UNC-13L are not involved in the regulation of protein localization.

The increased tonic and evoked release in sUNC-13 could arise from an increased abundance of sUNC-13 proteins, allowing sUNC-13 to trigger more SV release. To examine the protein levels of UNC-13L and sUNC-13, we quantified the tagged mApple fluorescence intensity and the punctum size. As shown in Figure 3N, both the expression levels and the punctum size of

UNC-13L and sUNC-13 were comparable. Thus, our results demonstrate that sUNC-13 increases the release probability of entire synapses and single SVs by enhancing the  $\text{Ca}^{2+}$  sensitivity of SV exocytosis without increasing protein abundance.

### SUNC-13 Weakens Synaptic Depression and Accelerates Synaptic Recovery

The highly increased release probability induced by sUNC-13 indicates a change in synaptic plasticity. The cholinergic synapses at the worm NMJ exhibit synaptic depression when receiving a train stimulus (Liu et al., 2009). The  $P_{vr}$  of the entire synapse in sUNC-13 rescue animals reached 0.5, which means that half of the total SVs in the primed vesicular pool were released in response to one stimulus, presumably resulting in stronger synaptic depression. To test this, a line expressing ChIEF, a variant of channelrhodopsin (Watanabe et al., 2013), was crossed into the UNC-13L and sUNC-13 rescue lines. Application of a 1-Hz or 5-Hz train light stimulus led to synaptic depression in UNC-13L rescue worms. Unexpectedly, sUNC-13 worms exhibited markedly decreased depression in response to both the 1-Hz and 5-Hz stimulus (Figures 4A and 4D). The ratios of the second, third, and fourth EPSCs to the first EPSC were significantly higher in sUNC-13 rescue worms (Figures 4B and 4E). The depression was slowed 3-fold by sUNC-13 compared with UNC-13L, as determined by the time constant of mono-exponential fits used to describe the normalized amplitude decay (Figures 4C and 4F). Synaptic depression can be caused by both presynaptic vesicular pool depletion and postsynaptic receptor desensitization (Regehr, 2012). Given that the UNC-13 constructs were only expressed in presynaptic neurons, and the mEPSC amplitude was unaltered in the sUNC-13 rescue animals (Figures 2E and 2G), our results indicate that sUNC-13 weakens synaptic depression via a presynaptic mechanism.

Although the ratio of synaptic depression for sUNC-13 eventually fell to the same level as that for UNC-13L, sUNC-13-mediated EPSCs in the steady state during the train stimulus were 2- to 3-fold larger than those mediated by UNC-13L. Considering the normal size of the RRP, there must have been a faster replenishment rate of the vesicular pool to compensate for the faster depletion of the vesicular pool in the synaptic terminals expressing sUNC-13. The replenishment rate was described by the slope of the cumulative EPSCs and calculated by a line fit through the linear section (Figures 4G and 4I). We found that the replenishment rates were significantly faster in the sUNC-13 rescue than those in the UNC-13L rescue under a 1-Hz or

(G) Evoked EPSCs recorded from various  $\text{Ca}^{2+}$  levels (0.25, 0.5, and 1 mM) from UNC-13L (blue) and sUNC-13 (red) rescue animals.

(H) Example traces of averaged mEPSCs from the indicated genotypes.

(I) Quantification of the decay  $\tau$  of the mEPSCs.

(J) Hypertonic sucrose-evoked current recorded from wild-type (black) and *unc-13* mutants rescued by UNC-13L (blue) or sUNC-13 rescue (red).

(K) Averaged charge transfer from the sucrose-evoked currents in (H).

(L) Quantification of the probability of synaptic vesicle release ( $P_{vr}$ ) from the indicated genotypes.

(M) Top: representative confocal z stack images for UNC-13L and UNC-10/RIM (left) and sUNC-13 and UNC-10/RIM (right). Scale bar, 5  $\mu\text{m}$ . Bottom: line scans along the dorsal nerve cord.

(N) Quantification of the fluorescence intensity and punctum size of UNC-13L::mApple and sUNC-13::mApple.

Data in (G) are presented as mean  $\pm$  SEM, and all other data are shown as box-and-whisker plots with median (line) and mean (cross) indicated. # $p < 0.05$ , ## $p < 0.01$ , ### $p < 0.001$  compared with the wild type; \*\* $p < 0.01$ , \*\*\* $p < 0.001$  compared with UNC-13L rescue; Student's t test for data in (G), one-way ANOVA following Kruskal-Wallis test for data in (B) and (C), and one-way ANOVA for all other data. The number of worms analyzed for each genotype is indicated under each box.



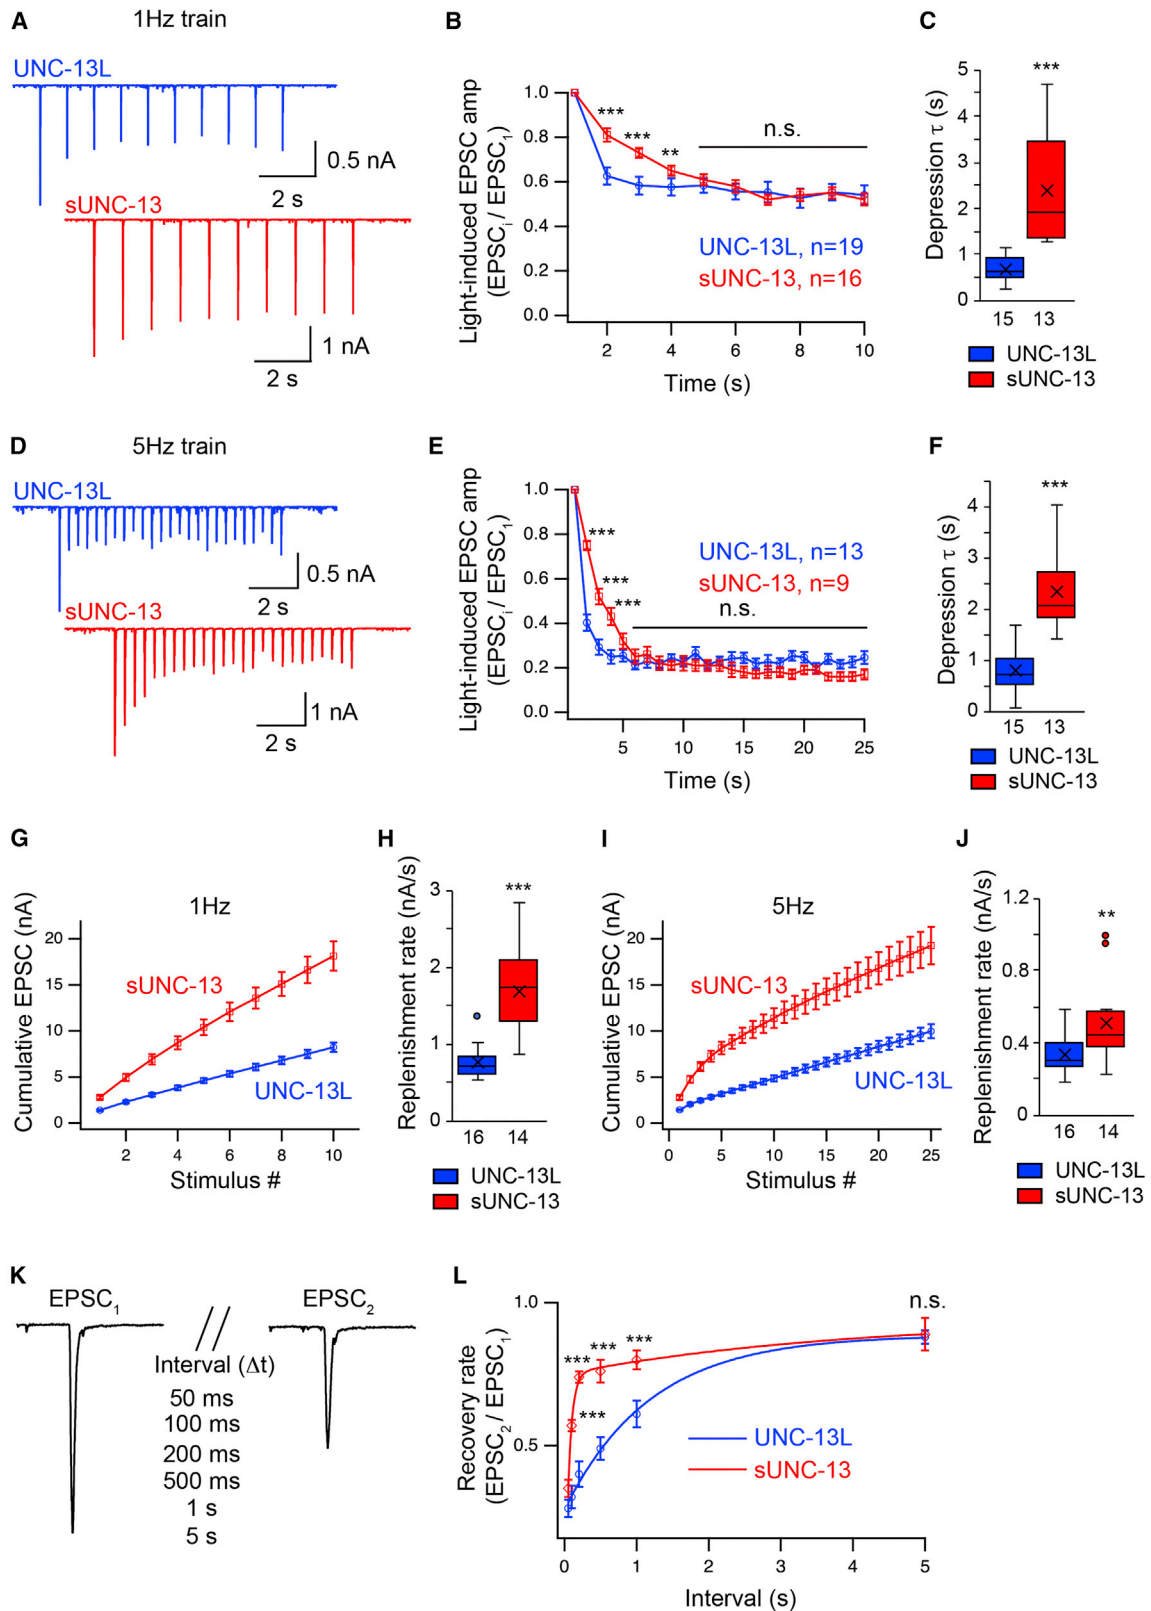

(legend on next page)

5-Hz stimulus (Figures 4H and 4J). Thus, our results indicate that sUNC-13 enhances the replenishment rate of the RRP to overcome the fast depletion that occurs during the train stimulus, allowing a continuous high release probability and producing decreased synaptic depression.

To determine whether sUNC-13 is involved in RRP dynamics, we next measured synaptic recovery in response to a paired stimulus with various intervals ranging from 50 ms to 5 s (Figure 4K). The recovery rate of the vesicular pool was calculated by the ratio of the two paired EPSCs ( $EPSC_2/EPSC_1$ ). We found that synaptic recovery was significantly accelerated by sUNC-13 compared with UNC-13L (Figure 4L). It took 200 ms to reach 75% recovery of the EPSC in the sUNC-13 rescue, whereas it required 2 s to reach a similar level of recovery in the UNC-13L rescue. Synaptic recovery was also assessed in 0.5 mM  $Ca^{2+}$ , under which the initial release probability is supposed to be lower. Indeed, the first EPSCs recorded in 0.5 mM  $Ca^{2+}$  in sUNC-13 and UNC-13L rescues were significantly smaller than those in 1 mM  $Ca^{2+}$  (data not shown). Similar to the results obtained in 1 mM  $Ca^{2+}$ , synaptic recovery was faster in the sUNC-13 rescue in 0.5 mM  $Ca^{2+}$  (Figure S5). Moreover, synaptic recovery exhibited an increased trend when release probability was decreased (in 0.5 mM  $Ca^{2+}$ ) in the UNC-13L rescue (Figure S5C), but we did not observe an obvious change in sUNC-13 rescue (Figure S5D), probably because the initial release probability was not decreased enough in this case. We further compared synaptic depression between UNC-13L and sUNC-13 in 0.5 mM  $Ca^{2+}$ . Interestingly, the EPSC train mediated by sUNC-13 exhibited increased depression in the late stage (1 Hz and 5 Hz) (Figures S5E and S5F), corresponding to the increased  $P_{vr}$  of the entire synapse. The unchanged (1 Hz) or decreased (5 Hz) depression at the early stage may arise from a compensation of faster replenishment. Together, these results demonstrate that sUNC-13 accelerates the replenishment rate of the RRP, consistent with our cumulative EPSC results.

### The C2A Domain and the Linker Domains Are Essential for sUNC-13 Function

The above results all demonstrate that sUNC-13 is hyperactive in mediating SV release. To understand how this hyperactivity is

achieved, we investigated the domain functions in sUNC-13. The N-terminal C2A domain appears to be important because our prior studies have found that the C2A domain in UNC-13L is required for tonic and evoked neurotransmitter release (Liu et al., 2019). Apart from the C2A domain, several linker domains are retained in sUNC-13 (Figure 5A). These linkers separate the X, C1, and C2B domains in UNC-13L but form a large linker between the C2A and Munc13 homology (MUN) domains in sUNC-13. To determine the functional importance of the C2A domain and the linker domain in sUNC-13, we examined SV release in *unc-13* mutants rescued by sUNC-13 lacking the C2A domain (sUNC-13 $\Delta$ C2A) or the linker domain (sUNC-13 $\Delta$ linker) (Figure 5A). We observed a large reduction in mEPSC frequency in 0 mM  $Ca^{2+}$  (Figures 5B and 5C) and a pronounced decrease in evoked EPSCs (including their amplitude, charge transfer, and decay) in both sUNC-13 $\Delta$ C2A and sUNC-13 $\Delta$ linker rescue animals (Figures 5E and 5F). These results confirmed that both the C2A and linker domains play essential roles in the activity of sUNC-13. However, the sUNC-13 $\Delta$ linker and sUNC-13 $\Delta$ C2A still restored the RRP to a wild-type level, indicating that they are not involved in SV priming (Figures 5G and 5H). Consequently, the release probability of both the entire synapse and single SVs were largely decreased by removal of the C2A or linker domain from sUNC-13 (Figure 5I). Moreover, deleting C2A or the linker resulted in stronger synaptic depression compared with that of sUNC-13 (Figures 5J and 5K). The decreased SV release caused by deletion of the C2A or linker domain in sUNC-13 is unlikely to be caused by changes in protein abundance because the expression levels in sUNC-13 $\Delta$ C2A and sUNC-13 $\Delta$ linker were indistinguishable from that in sUNC-13 (Figures 5L and 5M). Together, these results demonstrate that the C2A domain and the linker are both important for hyperactivity of sUNC-13.

Similar to the results for mEPSCs, the mIPSC frequency was also largely decreased in 0 mM  $Ca^{2+}$  when the C2A domain was removed in sUNC-13 (Figure 5D). However, deleting the linker in sUNC-13 did not cause a change in mIPSC frequency in 0 mM  $Ca^{2+}$  (Figure 5D), indicating that the hyperactivity of sUNC-13 in GABAergic synapses does not rely on the linker, although the linker is required for sUNC-13 at cholinergic

### Figure 4. sUNC-13 Weakens Synaptic Depression and Accelerates Synaptic Recovery

Synaptic depression and recovery were investigated by applying a train (1 Hz and 5 Hz) or a paired light stimulus onto the ventral nerve cord of UNC-13L (blue) and sUNC-13 (red) rescue worms with expression of ChIEF in their cholinergic motor neurons.

(A) Example traces of 1-Hz light train stimulus-evoked EPSCs from UNC-13L and sUNC-13 rescue animals.

(B) Quantification of synaptic depression by normalizing the EPSC amplitude ( $EPSC_i$ ) to the first EPSC amplitude ( $EPSC_1$ ) ( $n = 19$  for UNC-13L rescue and  $n = 16$  for sUNC-13 rescue).

(C) Averaged depression  $\tau$  of the normalized EPSC amplitude in (B).

(D) Example traces of 5-Hz light train stimulus-evoked EPSCs from the same genotypes as in (A).

(E) Quantification of synaptic depression by normalizing the EPSC to  $EPSC_1$  ( $n = 13$  for UNC-13L rescue and  $n = 9$  for sUNC-13 rescue).

(F) Averaged depression  $\tau$  of the normalized EPSC amplitude in (E).

(G and I) Averaged cumulative EPSC amplitudes during 1-Hz (G) and 5-Hz (I) trains.

(H and J) Quantification of the replenishment rates in (G) and (I), respectively.

(K) Evoked EPSCs triggered by a paired light stimulus with various intervals ranging from 50 ms to 5 s.

(L) Averaged synaptic recovery, calculated by the ratio of  $EPSC_2$  to  $EPSC_1$ , in UNC-13L and sUNC-13 rescue animals (UNC-13L rescue, 50 ms  $n = 6$ , 100 ms  $n = 6$ , 200 ms  $n = 10$ , 500 ms  $n = 7$ , 1 s  $n = 11$ , 5 s  $n = 7$ ; sUNC-13 rescue, 50 ms  $n = 7$ , 100 ms  $n = 9$ , 200 ms  $n = 7$ , 500 ms  $n = 6$ , 1 s  $n = 7$ , 5 s  $n = 6$ ).

Data in (B), (E), (G), (I), and (L) are presented as mean  $\pm$  SEM, and all other data are shown as box-and-whisker plots with both median (line) and mean (cross) indicated. \*\* $p < 0.01$ , \*\*\* $p < 0.001$  compared with UNC-13L rescue; Student's *t* test for data in (B), (E), and (L); Mann-Whitney test for data in (C), (H), and (J). The number of worms analyzed for each genotype is indicated under each box.

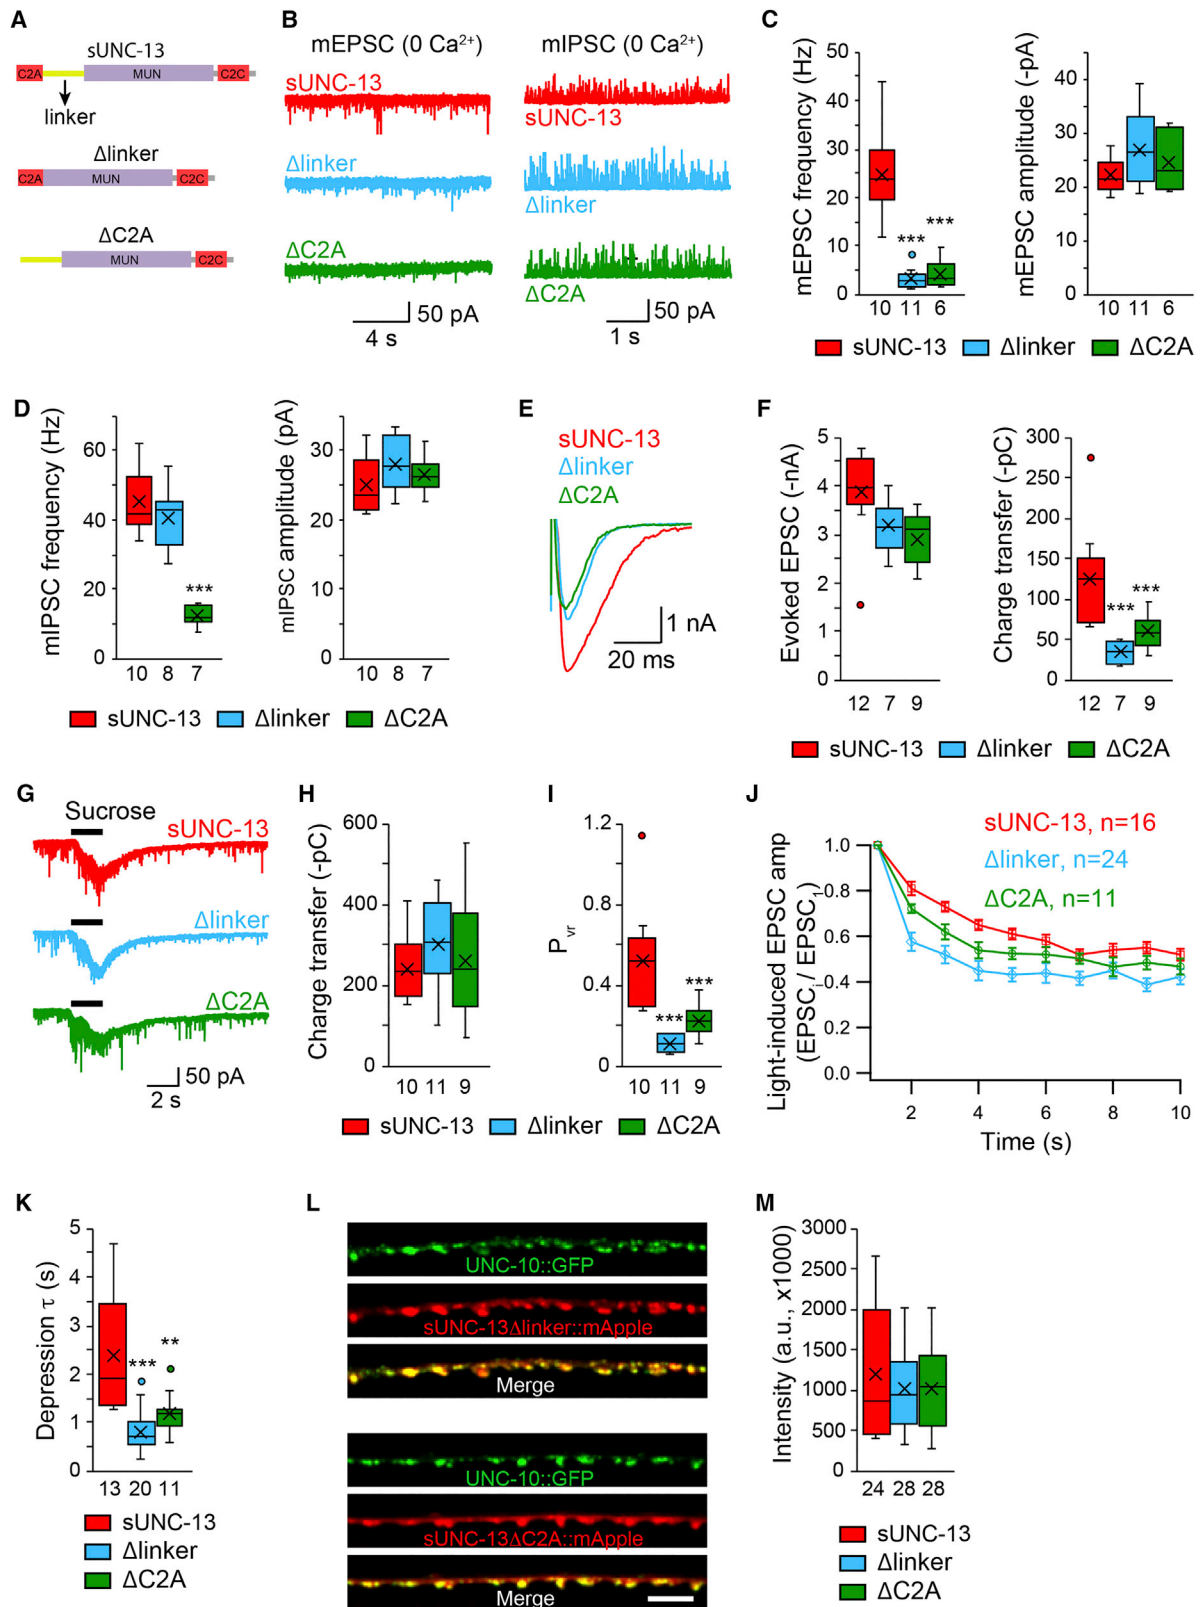

(legend on next page)

synapses (Figure 5C). This is probably due to a lower threshold of SV fusion in GABAergic synapses (Liu et al., 2018).

Given that the linker between C2A and MUN consists of three small independent linkers (linker 1, linker 2, and linker 3; Figure S6A), we next asked whether these three linkers are all required for sUNC-13 activity. To test this, each linker was removed from sUNC-13 (termed  $\Delta$ linker1,  $\Delta$ linker2, and  $\Delta$ linker3; Figure S6A), leading to a large reduction in mEPSC and mIPSC frequency in 0 mM  $\text{Ca}^{2+}$  (Figures S6B–S6G) and a pronounced decrease in the amplitude and charge transfer of the evoked EPSCs (Figures S6H–S6J). These results indicate that a proper length of linker between C2A and MUN is essential for sUNC-13 activity.

### sUNC-13 Enhances the Release Probability of Single SVs by Opening Syntaxin-1A

How does sUNC-13 enhance release probability? Of all functional domains in UNC-13/Munc13, the MUN domain has been shown to be of central importance. It has been reported that the MUN domain binds syntaxin and catalyzes its opening, promoting SNARE complex assembly and membrane fusion (Madison et al., 2005; Guan et al., 2008; Yang et al., 2015). Thus, it is likely that the high release probability mediated by sUNC-13 arises from the increased activity of syntaxin. If this is the case, then the synaptic transmission mediated by sUNC-13 should be abolished in the absence of syntaxin. We tested this by introducing a mutation (*unc-64(e246)*) that reduces syntaxin-1A function in sUNC-13 rescue animals. The mEPSCs and mIPSCs recorded in 0 mM  $\text{Ca}^{2+}$  were nearly eliminated in *unc-64* mutants (Figures 6A–6F), consistent with our previous findings (Liu et al., 2018). Moreover, sUNC-13-mediated tonic release was completely arrested in sUNC-13;*unc-64* double mutants in 0 mM  $\text{Ca}^{2+}$  (Figure S7A–S7F) as well as in 0.1 mM  $\text{Ca}^{2+}$  (Figures S7C and S7D). These results clearly demonstrate that the tonic release mediated by sUNC-13 requires UNC-64/syntaxin-1A.

The elimination of tonic release in sUNC-13;*unc-64* double mutants could simply be due to the fact that UNC-64 is required for all tonic release, no matter how it is triggered. If this were true, then it would not be surprising that we did not observe tonic release in sUNC-13;*unc-64* double mutants. We therefore tested this possibility using the *cpx-1* mutant, in which tonic release is also highly increased in low  $\text{Ca}^{2+}$  (Wragg et al., 2013; Liu et al., 2018). Strikingly, we found that tonic release persists

in *cpx-1;unc-64* double mutants. Particularly in 0.1 mM  $\text{Ca}^{2+}$ , the mEPSCs and mIPSCs occurred at much higher frequencies in *cpx-1;unc-64* double mutants than in sUNC-13;*unc-64* double mutants (Figure S7). These results support the idea that sUNC-13 increases tonic release by specifically activating UNC-64/syntaxin-1A.

When in the open conformation, syntaxin is competent to form SNARE complexes. Our results therefore support the hypothesis that sUNC-13 enhances release probability by opening syntaxin in a highly efficient manner. If this is correct, then we would expect to see an increase in the release probability when syntaxin is in an opened conformation. Prior studies have identified two point mutations (L165/166E) in mouse syntaxin that shift its default conformation from closed to open (Dulubova et al., 1999). These two residues are highly conserved in *C. elegans* UNC-64 (Richmond et al., 2001; McEwen et al., 2006; Hammarlund et al., 2007). We therefore examined whether the release probability was increased by an opened UNC-64(L169/170E) (hereafter termed UNC-64(open)). The impairment in tonic release in *unc-64* mutants was restored by neuronal expression of wild-type UNC-64 (Figures 6A–6F). By comparison, expressing UNC-64(open) in *unc-64* mutants led to a significant increase in tonic release in 0 mM  $\text{Ca}^{2+}$  (increased ratio: mEPSC, 10-fold; mIPSC, 3-fold). These findings clearly demonstrate that open syntaxin facilitates the release probability of single SVs.

We next asked whether the release probability was further increased in the presence of both sUNC-13 and UNC-64(open). Our results showed that the mEPSCs and mIPSCs in sUNC-13;UNC-64(open) animals were similar to those in UNC-64(open) rescue animals in 0 mM  $\text{Ca}^{2+}$  (Figures 6A–6F). These results indicate that sUNC-13 is unable to increase the release probability of single SVs when syntaxin is already open. Our findings therefore support a model where sUNC-13 enhances the release probability of single SVs by opening syntaxin more efficiently, perhaps by stabilizing the open conformation. It should be noted that the mEPSC frequency rescued by UNC-64(open) was significantly lower than that rescued by sUNC-13 (Figures 6C and 6E). This could result from some unknown effects of UNC-64(open) in the absence of  $\text{Ca}^{2+}$ . It has been reported that closed syntaxin has a positive role in stabilizing syntaxin-1 and Munc18-1 and that syntaxin-1 and Munc18-1 levels decrease when syntaxin becomes open (Gerber et al., 2008). To investigate their  $\text{Ca}^{2+}$  sensitivity, we recorded mEPSCs in UNC-64(open)

### Figure 5. The C2A and Linker Domains Are Essential for sUNC-13 Function

(A) Cartoon depicting the domain structure of sUNC-13, sUNC-13 $\Delta$ linker, and sUNC-13 $\Delta$ C2A.

(B–D) Representative traces and boxplot of the frequency and amplitude of mEPSCs and mIPSCs recorded from sUNC-13 rescue,  $\Delta$ linker rescue, and  $\Delta$ C2A rescue animals in 0 mM  $\text{Ca}^{2+}$ .

(E and F) Representative traces and summary of the amplitude, charge transfer, and decay of the evoked EPSCs recorded from sUNC-13 rescue and  $\Delta$ linker rescue and  $\Delta$ C2A rescue in 1 mM  $\text{Ca}^{2+}$ .

(G–I) Example traces of hypertonic sucrose-evoked currents (G), averaged charge transfer of sucrose currents (H), and  $P_{vr}$  (I) from the indicated genotypes.

(J) 1-Hz light train stimulus-triggered EPSCs from sUNC-13 rescue,  $\Delta$ linker rescue, and  $\Delta$ C2A rescue animals.

(K) Synaptic depression, analyzed by the normalization of the amplitude of the EPSCs to the amplitude of the first EPSC.

(L) Representative confocal z stack images for sUNC-13 $\Delta$ linker and sUNC-13 $\Delta$ C2A (tagged with mApple) and their colocalization with UNC-10/RIM (tagged with GFP). Scale bar, 5  $\mu\text{m}$ . Bottom: line scans along the dorsal nerve cord.

(M) Quantification of the fluorescence intensity of sUNC-13 $\Delta$ linker::mApple and sUNC-13 $\Delta$ C2A::mApple.

Data in (J) are presented as mean  $\pm$  SEM, and all other data are shown as box-and-whisker plots with median (line) and mean (cross) indicated. \*\* $p < 0.01$ , \*\*\* $p < 0.001$  compared with sUNC-13 rescue; one-way ANOVA test for data in (D), (H), and (M); one-way ANOVA following Kruskal-Wallis test for data in (C), (F), (I), and (K). The number of worms analyzed for each genotype is indicated under each box.



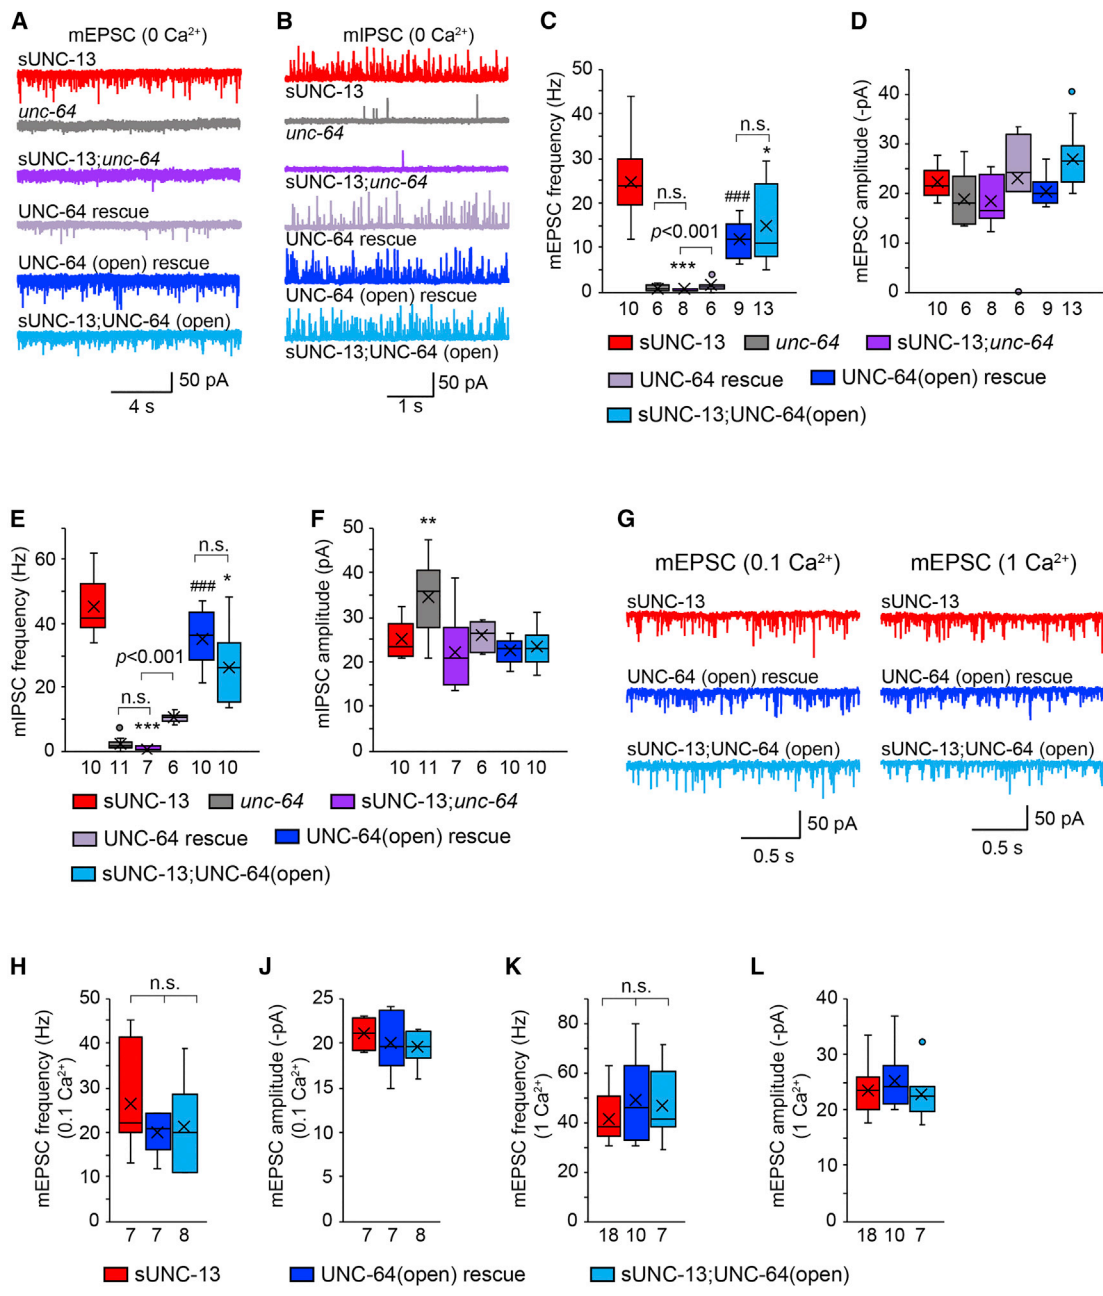

**Figure 6. sUNC-13 Increases the Release Probability of Single SVs by Opening UNC-64/Syntaxin**  
 (A and B) Representative traces of the mEPSCs (A) and mIPSCs (B) recorded from the indicated genotypes in 0 mM  $Ca^{2+}$ .  
 (C–F) Quantification of the frequencies and amplitudes of the mEPSCs and mIPSCs from the indicated genotypes in (A) and (B).  
 (G) Representative traces of the mEPSCs recorded from the indicated genotypes in 0.1 mM and 1 mM  $Ca^{2+}$ .  
 (H–L) Averaged mEPSC frequencies and amplitudes from the same genotypes as in (G).  
 Data are shown as box-and-whisker plots with median (line) and mean (cross) indicated. \* $p < 0.05$ , \*\* $p < 0.01$ , \*\*\* $p < 0.001$  compared with sUNC-13 rescue; ### $p < 0.001$  compared with UNC-64 rescue in *unc-64* mutants; one-way ANOVA test for data in (C), (D), (F), and (H); one-way ANOVA following Kruskal-Wallis test for data in (E) and (J)–(L). The number of worms analyzed for each genotype is indicated under each box.

animals at 0.1 mM and 1 mM  $Ca^{2+}$ . Our results showed that, in the presence of  $Ca^{2+}$ , UNC-64(open) restored the mEPSCs to a similar level as that observed in sUNC-13 rescue animals (Figures 6G–6L). Furthermore, no additional increase in tonic release was

observed in sUNC-13; UNC-64(open) animals in either 0.1 mM or 1 mM  $Ca^{2+}$ . These data support the idea that sUNC-13 enhances the release probability of single SVs by opening UNC-64/syntaxin-1A in a highly efficient manner.



The above findings raise the question of whether sUNC-13 is still required when syntaxin is in an open conformation. To address this, we tested whether UNC-64(open) can bypass UNC-13 and restore tonic release in *unc-13* mutants. We observed poor rescue of the tonic release when UNC-64(open) was expressed in *unc-13* null mutants. The mEPSCs and mIPSCs in 1 mM  $\text{Ca}^{2+}$  were only slightly increased in UNC-64(open);*unc-13* double mutants compared with *unc-13* mutants (Table S1). This suggests that sUNC-13 is still required to trigger a high probability of SV fusion when syntaxin is open. These results are consistent with previous reports that showed that the SNARE complex cannot be correctly assembled when Munc13 is deleted (McEwen et al., 2006; Hammarlund et al., 2007; Lai et al., 2017).

### sUNC-13 Enhances the Release Probability of Entire Synapses via an Additional Mechanism

We next examined whether opening UNC-64/syntaxin-1A with high efficiency could account for the role of sUNC-13 in enhancing the release probability of entire synapses. The evoked EPSCs in sUNC-13;*unc-64* double mutants were completely eliminated, indicating that sUNC-13 regulates evoked neurotransmitter release by activating UNC-64/syntaxin-1A (Figures 7A–7C), similar to our observations in relation to tonic release. Neuronal expression of UNC-64 in *unc-64* mutants restored the deficits in evoked EPSCs and the RRP, and expression of UNC-64(open) in *unc-64* mutants led to a significant increase in the amplitude, charge transfer, and decay of evoked EPSCs (Figures 7A–7D) but not the RRP (Figures 7E and 7F). Consequently, the  $P_{vr}$  was significantly increased 3-fold by UNC-64(open) compared with UNC-64 (Figure 7G), demonstrating that open syntaxin enhances the release probability of entire synapses. However, both the charge transfer and  $P_{vr}$  of evoked EPSCs mediated by UNC-64(open) were much smaller than those mediated by sUNC-13. These results suggest that sUNC-13 may have additional functions in triggering evoked neurotransmitter release.

We tested this idea by assessing the evoked EPSCs in sUNC-13;UNC-64(open) double rescue animals. The charge transfer and decay of evoked EPSCs in sUNC-13;UNC-64(open) animals were significantly increased compared with those in UNC-64(open) animals but were close to those observed in sUNC-13 animals (Figures 7C and 7D). This indicates that sUNC-13 could further increase evoked release despite the fact that syntaxin-1A was open. On the other hand, UNC-64(open) did not cause an additional increase in evoked EPSCs triggered by sUNC-13. In addition, the effect of UNC-64(open) on evoked neurotransmitter release requires the presence of UNC-13 because the evoked EPSCs were poorly restored in UNC-64(open);*unc-13* double mutants (Table S1). The size of the RRP was normal in sUNC-13;UNC-64(open) animals, leading to a  $P_{vr}$  of the entire synapses that was close to that in sUNC-13 animals (Figure 7G). These results demonstrate that the function of sUNC-13 in evoked release is not limited to opening UNC-64/syntaxin-1A. Instead, it could function beyond that, presumably by regulating the activity of the opened syntaxin during SNARE assembly, thereby enhancing the probability of evoked neurotransmitter release.

## DISCUSSION

In this study, we identified a more active form of UNC-13 (sUNC-13) that lacks three inhibitory domains (X, C1, and C2B). sUNC-13 leads to dramatically increased SV exocytosis because of enhanced  $\text{Ca}^{2+}$  sensitivity, increased release probability, decreased synaptic depression, and accelerated RRP refilling and synaptic recovery. Below we discuss the importance of our findings.

### Facilitatory and Inhibitory Regulation of UNC-13 in Neurotransmitter Release

The multiple domains in Munc13-1 and their distinct binding partners suggest that Munc13-1 may have various regulatory roles in synaptic transmission and plasticity. Prior studies have shown that SV priming and  $\text{Ca}^{2+}$ -triggered SV exocytosis are reduced by removal of the Munc13-1 C2A domain, suggestive of a facilitatory role of C2A in SV release (Zhou et al., 2013; Camacho et al., 2017; Liu et al., 2019). A recent study reported that the C2B domain in UNC-13L inhibits neurotransmitter release at the *C. elegans* NMJ (Michelassi et al., 2017). Notably, the function of the C2B domain appears to be conserved between UNC-13L and mouse Munc13-1 because replacing the UNC-13L C2B domain with Munc13-1 C2B fully restores the synaptic inhibition caused by C2B deletion. Moreover, the results we obtained using UNC-13L(H696K) resemble those observed with the same mutation in the Munc13-1 C1 domain (H567K), indicating that the function of the C1 domain is also conserved. These findings clearly demonstrate that UNC-13L/Munc13-1 has two opposite regulatory functions in synaptic transmission and that the underlying mechanisms appear to be conserved between worm and mouse.

Although it is still unclear how UNC-13L/Munc13-1 promotes SV fusion, recent work on its crystal structure has suggested that Munc13-1 may act as a bridge between the plasma membrane and SVs (Liu et al., 2016; Xu et al., 2017). In this model, domains flanking the MUN domain bind to the plasma membrane and vesicular membrane, respectively, exposing the MUN domain. This enables it to catalyze SNARE complex assembly and promote membrane fusion. In light of this model, facilitatory and inhibitory regulation of UNC-13L/Munc13-1 in synaptic transmission likely results from different functions of the MUN domain (e.g., position, conformation, or activity) that subsequently affect the status of the SNARE complex. Thus, our studies, together with previous reports, demonstrate that UNC-13L/Munc13-1 can exert both facilitatory and inhibitory effects on SV exocytosis (Zhou et al., 2013; Camacho et al., 2017; Michelassi et al., 2017; Liu et al., 2019) and that the synaptic transmission mediated by UNC-13L reflects an interaction between facilitation and inhibition. These opposing functions of UNC-13L suggest that it could be one of the major substrates that regulates the heterogeneity of synaptic plasticity at synaptic terminals.

### sUNC-13 Increases the Release Probability of Entire Synapses and Single SVs

Many factors are involved in the regulation of release probability, with the status or activity of the SNARE complex playing an

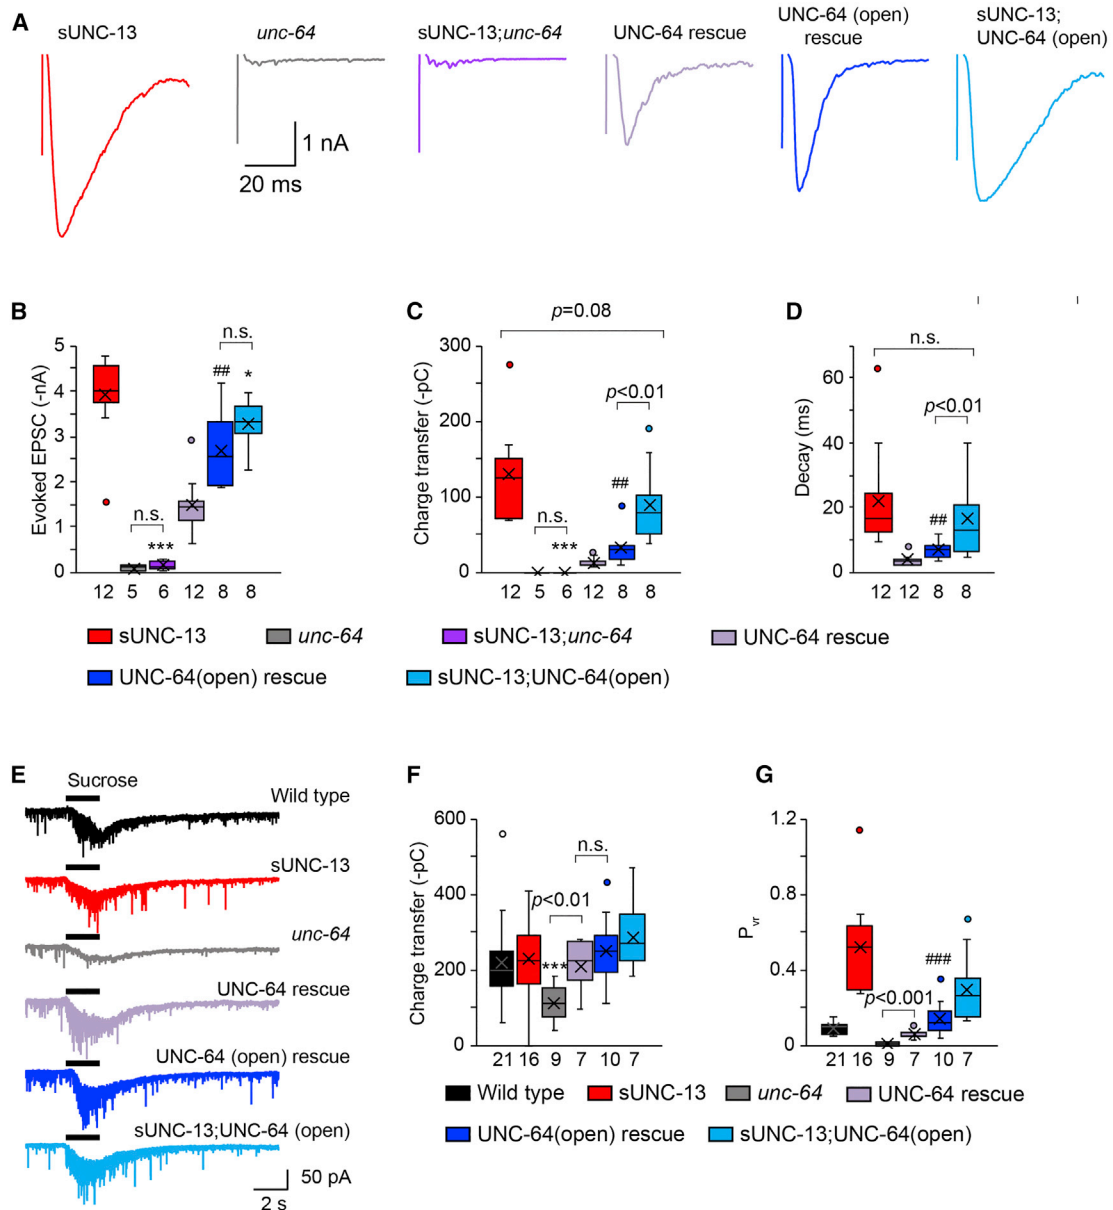

**Figure 7. sUNC-13 Increases the Release Probability of Entire Synapses beyond Opening UNC-64/Syntaxin**

(A) Example traces of stimulus-evoked EPSCs from the indicated genotypes.

(B–D) Quantification of the amplitude (B), charge transfer (C), and decay (D) of the evoked EPSCs in (A).

(E and F) Representative traces of sucrose-evoked current (E) and averaged charge transfer (F) from the indicated genotypes.

(G) Quantification of the release probability of entire synapses ( $P_{vr}$ ). Data are shown as box-and-whisker plots with median (line) and mean (cross) indicated. \* $p < 0.05$ , \*\*\* $p < 0.001$  compared with sUNC-13 rescue; ## $p < 0.01$ , ### $p < 0.001$  compared with UNC-64 rescue in *unc-64* mutants; one-way ANOVA test for data in (B), (C), and (G); one-way ANOVA following Kruskal-Wallis test for data in (D) and (F). The number of worms analyzed for each genotype is indicated under each box.

important role. We have shown that sUNC-13 and UNC-64(open) enhance the release probability of entire synapse and single SVs, implying a common mechanism that increases the fusogenicity of SVs by sUNC-13 and open syntaxin. It has been suggested that UNC-13L/Munc13-1 regulates SV fusion by opening closed syntaxin via its MUN domain, which physically binds to syntaxin (Guan et al., 2008). Moreover, we found that sUNC-13 greatly en-

hances the  $Ca^{2+}$  sensitivity of evoked and tonic neurotransmitter release. Thus, our results support a model whereby sUNC-13 increases the open probability of syntaxin, thereby enhancing the  $Ca^{2+}$  sensitivity and release probability of SVs. This appears to be true because the mEPSCs mediated by sUNC-13 and UNC-64(open) were comparable in their frequencies in the presence of  $Ca^{2+}$  (0.1 mM and 1 mM  $Ca^{2+}$ ). Moreover, no additional

increase was found in sUNC-13;UNC-64(open) animals (Figures 6G–6L). Our results therefore demonstrate that sUNC-13 enhances the release probability of single SVs by opening syntaxin in a highly efficient manner.

However, the mechanism for tonic release does not appear to account for the role of sUNC-13 in evoked neurotransmitter release. The sUNC-13-mediated evoked charge transfer and  $P_{vr}$  of entire synapses are much higher than those mediated by UNC-64(open) (Figures 7C and 7G). In addition, the evoked release (including amplitude, charge transfer, and decay) and  $P_{vr}$  in sUNC-13;UNC-64(open) animals were nearly comparable with those in sUNC-13 animals. This indicates that sUNC-13 may function beyond enhancing the open probability of syntaxin in evoked neurotransmitter release. However, the sUNC-13-mediated evoked release was completely abolished in sUNC-13;*unc-64* double mutants, suggesting that sUNC-13 specifically targets syntaxin in regulating evoked release. Thus, our results indicate that sUNC-13 could further regulate the activity of the opened syntaxin during SNARE assembly to increase the evoked release to a much higher level. It is also possible that the highly increased open probability of syntaxin produces more opened syntaxin, enhancing the average number of assembled SNARE complexes at the release site.

### sUNC-13 Regulates the Dynamics of the Priming Pool

A higher initial release probability often leads to stronger synaptic depression and slower synaptic recovery because of faster depletion of the vesicular pool (Regehr, 2012). However, we found that sUNC-13 enhanced the release probability but decreased synaptic depression and accelerated synaptic recovery (Figure 4). These unexpected findings raise the possibility that sUNC-13 has a role in RRP replenishment, presumably by accelerating the replenishment rate, thereby compensating for fast depletion. Indeed, our analysis of the cumulative EPSCs during a train stimulus showed that the replenishment rate was significantly increased by sUNC-13. These results demonstrate that the X, C1, and C2B domains inhibit the refilling process in the SV cycle, although it is unclear how each of these three domains contributes to this inhibition.

How are RRP dynamics regulated by sUNC-13? Many factors have been implicated in the regulation of RRP dynamics, among which increases in presynaptic calcium have been shown to be important in accelerating synaptic recovery from depression (Dittman and Regehr, 1998; Stevens and Wesseling, 1998; Xu-Friedman and Regehr, 2004; Sakaba, 2008), presumably by accelerating replenishment of the RRP. It is therefore possible that sUNC-13 influences  $Ca^{2+}$  entry at nerve terminals. This is likely because previous studies have reported that the Munc13-1 C2B domain binds to voltage-gated  $Ca^{2+}$  channels and regulates the effectiveness of  $Ca^{2+}$  influx (Calloway et al., 2015), raising the possibility that the worm C2B domain is also involved in regulation of presynaptic  $Ca^{2+}$  dynamics. The effect on  $Ca^{2+}$  entry could be even stronger in sUNC-13 rescue animals because of the much higher release probability. In addition, the largely enhanced  $Ca^{2+}$  sensitivity because of sUNC-13 could also contribute to faster synaptic recovery. It is also possible that the RRP contains different sub-pools (Neher, 2015) and that the sub-pools in sUNC-13 animals have different character-

istics, somehow leading to slow depression and faster recovery. Overall, despite the normal size of the RRP in sUNC-13 animals, sUNC-13 regulates the dynamics of the vesicular pool, and this process appears to be activity dependent.

### Function of the Linker Domains in Regulating UNC-13 Activity

Our results indicate that the linker is playing an important role in regulating the activity of the MUN domain, presumably by placing it in the most favorable position and conformation to open syntaxin and catalyze SNARE complex assembly. So far it is still unclear how UNC-13L/Munc13-1 establishes the bridge between SVs and the plasma membrane. One hypothesis is that mobility of the MUNC2C domain promotes the “capture” of a vesicle. The linker between the C2A and MUN domains could make MUNC2C more flexible (increasing its mobility), whereas this fragment becomes more rigid when the linker is removed, decreasing the probability that it will capture vesicles. It is also possible that this domain has other unknown functions.

### STAR★METHODS

Detailed methods are provided in the online version of this paper and include the following:

- KEY RESOURCES TABLE
- LEAD CONTACT AND MATERIALS AVAILABILITY
- EXPERIMENTAL MODEL AND SUBJECT DETAILS
- METHOD DETAILS
  - Constructs, transgenes and germline transformation
  - Fluorescence imaging
  - Electrophysiology
  - Retinal feeding
  - Light stimulation
- QUANTIFICATION AND STATISTICAL ANALYSIS
  - Data acquisition and analysis
  - Statistical analysis
- DATA AND CODE AVAILABILITY

### SUPPLEMENTAL INFORMATION

Supplemental Information can be found online at <https://doi.org/10.1016/j.celrep.2019.08.018>.

### ACKNOWLEDGMENTS

We thank the *C. elegans* Genetics Stock Center for strains and reagents. We thank Dr. Jeremy Dittman for providing the following strains: JSD1067, JSD1062, JSD0835, and JSD0849. We thank Rowan Tweedale for critically reading the manuscript. This work was supported by an Australia Research Council Discovery Project grant (DP160100849 to Z.H.); a National Health and Medical Research Council Project grant (GNT1122351 to Z.H.); a National Alliance for Research on Schizophrenia and Depression (NARSAD) Young Investigator grant (24980 to Z.H.); a UQ Foundation Research Excellence Award (to Z.H.); and a National Institutes of Health (NIH) research grant (GM54728 to J.K.).

### AUTHOR CONTRIBUTIONS

J.M.K. and Z.H. conceived and designed the study. L.L. and H.L. performed most experiments. W.W. and Y.Y. performed other experiments. Q.H.

conducted the co-immunoprecipitation experiments. Z.H. wrote the manuscript. L.L., H.L., J.M.K., and Z.H. edited the manuscript.

## DECLARATION OF INTERESTS

The authors declare no competing interests.

Received: November 4, 2018

Revised: April 22, 2019

Accepted: July 31, 2019

Published: September 10, 2019

## REFERENCES

- Aravamudan, B., Fergestad, T., Davis, W.S., Rodesch, C.K., and Broadie, K. (1999). *Drosophila* UNC-13 is essential for synaptic transmission. *Nat. Neurosci.* *2*, 965–971.
- Augustin, I., Rosenmund, C., Südhof, T.C., and Brose, N. (1999). Munc13-1 is essential for fusion competence of glutamatergic synaptic vesicles. *Nature* *400*, 457–461.
- Basu, J., Betz, A., Brose, N., and Rosenmund, C. (2007). Munc13-1 C1 domain activation lowers the energy barrier for synaptic vesicle fusion. *J. Neurosci.* *27*, 1200–1210.
- Borst, J.G., and Sakmann, B. (1996). Calcium influx and transmitter release in a fast CNS synapse. *Nature* *383*, 431–434.
- Borst, J.G., and Sakmann, B. (1999). Effect of changes in action potential shape on calcium currents and transmitter release in a calyx-type synapse of the rat auditory brainstem. *Philos. Trans. R. Soc. Lond. B Biol. Sci.* *354*, 347–355.
- Brenner, S. (1974). The genetics of *Caenorhabditis elegans*. *Genetics* *77*, 71–94.
- Brose, N., Hofmann, K., Hata, Y., and Südhof, T.C. (1995). Mammalian homologues of *Caenorhabditis elegans* unc-13 gene define novel family of C2-domain proteins. *J. Biol. Chem.* *270*, 25273–25280.
- Calloway, N., Gouzer, G., Xue, M., and Ryan, T.A. (2015). The active-zone protein Munc13 controls the use-dependence of presynaptic voltage-gated calcium channels. *eLife* *4*.
- Camacho, M., Basu, J., Trimbuch, T., Chang, S., Pulido-Lozano, C., Chang, S.S., Dulubova, I., Abo-Rady, M., Rizo, J., and Rosenmund, C. (2017). Heterodimerization of Munc13 C<sub>2</sub>A domain with RIM regulates synaptic vesicle docking and priming. *Nat. Commun.* *8*, 15293.
- Catterall, W.A., and Few, A.P. (2008). Calcium channel regulation and presynaptic plasticity. *Neuron* *59*, 882–901.
- Chen, K., Richlitzki, A., Featherstone, D.E., Schwärzel, M., and Richmond, J.E. (2011). Tomosyn-dependent regulation of synaptic transmission is required for a late phase of associative odor memory. *Proc. Natl. Acad. Sci. USA* *108*, 18482–18487.
- Chen, Z., Cooper, B., Kalla, S., Varoqueaux, F., and Young, S.M., Jr. (2013). The Munc13 proteins differentially regulate readily releasable pool dynamics and calcium-dependent recovery at a central synapse. *J. Neurosci.* *33*, 8336–8351.
- Dittman, J.S., and Regehr, W.G. (1998). Calcium dependence and recovery kinetics of presynaptic depression at the climbing fiber to Purkinje cell synapse. *J. Neurosci.* *18*, 6147–6162.
- Dulubova, I., Sugita, S., Hill, S., Hosaka, M., Fernandez, I., Südhof, T.C., and Rizo, J. (1999). A conformational switch in syntaxin during exocytosis: role of munc18. *EMBO J.* *18*, 4372–4382.
- Dybbs, M., Ngai, J., and Kaplan, J.M. (2005). Using microarrays to facilitate positional cloning: identification of tomosyn as an inhibitor of neurosecretion. *PLoS Genet.* *1*, 6–16.
- Fioravante, D., and Regehr, W.G. (2011). Short-term forms of presynaptic plasticity. *Curr. Opin. Neurobiol.* *21*, 269–274.
- Gerber, S.H., Rah, J.C., Min, S.W., Liu, X., de Wit, H., Dulubova, I., Meyer, A.C., Rizo, J., Arancillo, M., Hammer, R.E., et al. (2008). Conformational switch of syntaxin-1 controls synaptic vesicle fusion. *Science* *321*, 1507–1510.
- Gracheva, E.O., Burdina, A.O., Holgado, A.M., Berthelot-Grosjean, M., Ackley, B.D., Hadwiger, G., Nonet, M.L., Weimer, R.M., and Richmond, J.E. (2006). Tomosyn inhibits synaptic vesicle priming in *Caenorhabditis elegans*. *PLoS Biol.* *4*, e261.
- Guan, R., Dai, H., and Rizo, J. (2008). Binding of the Munc13-1 MUN domain to membrane-anchored SNARE complexes. *Biochemistry* *47*, 1474–1481.
- Hammarlund, M., Palfreyman, M.T., Watanabe, S., Olsen, S., and Jorgensen, E.M. (2007). Open syntaxin docks synaptic vesicles. *PLoS Biol.* *5*, e198.
- Hobson, R.J., Liu, Q., Watanabe, S., and Jorgensen, E.M. (2011). Complexin maintains vesicles in the primed state in *C. elegans*. *Curr. Biol.* *21*, 106–113.
- Hu, Z., Hom, S., Kudze, T., Tong, X.J., Choi, S., Aramuni, G., Zhang, W., and Kaplan, J.M. (2012). Neurexin and neuroligin mediate retrograde synaptic inhibition in *C. elegans*. *Science* *337*, 980–984.
- Hu, Z., Tong, X.J., and Kaplan, J.M. (2013). UNC-13L, UNC-13S, and Tomosyn form a protein code for fast and slow neurotransmitter release in *Caenorhabditis elegans*. *eLife* *2*, e00967.
- Huntwork, S., and Littleton, J.T. (2007). A complexin fusion clamp regulates spontaneous neurotransmitter release and synaptic growth. *Nat. Neurosci.* *10*, 1235–1237.
- Koch, H., Hofmann, K., and Brose, N. (2000). Definition of Munc13-homology domains and characterization of a novel ubiquitously expressed Munc13 isoform. *Biochem. J.* *349*, 247–253.
- Körber, C., and Kuner, T. (2016). Molecular Machines Regulating the Release Probability of Synaptic Vesicles at the Active Zone. *Front. Synaptic Neurosci.* *8*, 5.
- Lai, Y., Choi, U.B., Leitz, J., Rhee, H.J., Lee, C., Altas, B., Zhao, M., Pfuetzner, R.A., Wang, A.L., Brose, N., et al. (2017). Molecular Mechanisms of Synaptic Vesicle Priming by Munc13 and Munc18. *Neuron* *95*, 591–607.e10.
- Lipstein, N., Sakaba, T., Cooper, B.H., Lin, K.H., Strenzke, N., Ashery, U., Rhee, J.S., Taschenberger, H., Neher, E., and Brose, N. (2013). Dynamic control of synaptic vesicle replenishment and short-term plasticity by Ca<sup>2+</sup>-calmodulin-Munc13-1 signaling. *Neuron* *79*, 82–96.
- Liu, Q., Hollopeter, G., and Jorgensen, E.M. (2009). Graded synaptic transmission at the *Caenorhabditis elegans* neuromuscular junction. *Proc. Natl. Acad. Sci. USA* *106*, 10823–10828.
- Liu, X., Seven, A.B., Camacho, M., Esser, V., Xu, J., Trimbuch, T., Quade, B., Su, L., Ma, C., Rosenmund, C., and Rizo, J. (2016). Functional synergy between the Munc13 C-terminal C1 and C2 domains. *eLife* *5*, e13696.
- Liu, H., Li, L., Wang, W., Gong, J., Yang, X., and Hu, Z. (2018). Spontaneous Vesicle Fusion Is Differentially Regulated at Cholinergic and GABAergic Synapses. *Cell Rep.* *22*, 2334–2345.
- Liu, H., Li, L., Nedelcu, D., Hall, Q., Zhou, L., Wang, W., Yu, Y., Kaplan, J.M., and Hu, Z. (2019). Heterodimerization of UNC-13/RIM regulates synaptic vesicle release probability but not priming in *C. elegans*. *eLife* *8*, e40585.
- Lou, X., Korogod, N., Brose, N., and Schneggenburger, R. (2008). Phorbol esters modulate spontaneous and Ca<sup>2+</sup>-evoked transmitter release via acting on both Munc13 and protein kinase C. *J. Neurosci.* *28*, 8257–8267.
- Madison, J.M., Nurrish, S., and Kaplan, J.M. (2005). UNC-13 interaction with syntaxin is required for synaptic transmission. *Curr. Biol.* *15*, 2236–2242.
- Malenka, R.C. (1994). Synaptic plasticity in the hippocampus: LTP and LTD. *Cell* *78*, 535–538.
- Martin, J.A., Hu, Z., Fenz, K.M., Fernandez, J., and Dittman, J.S. (2011). Complexin has opposite effects on two modes of synaptic vesicle fusion. *Curr. Biol.* *21*, 97–105.
- Maximov, A., Tang, J., Yang, X., Pang, Z.P., and Südhof, T.C. (2009). Complexin controls the force transfer from SNARE complexes to membranes in fusion. *Science* *323*, 516–521.

- McEwen, J.M., Madison, J.M., Dybbs, M., and Kaplan, J.M. (2006). Antagonistic regulation of synaptic vesicle priming by Tomosyn and UNC-13. *Neuron* 51, 303–315.
- Meinrenken, C.J., Borst, J.G., and Sakmann, B. (2003). Local routes revisited: the space and time dependence of the Ca<sup>2+</sup> signal for phasic transmitter release at the rat calyx of Held. *J. Physiol.* 547, 665–689.
- Michelassi, F., Liu, H., Hu, Z., and Dittman, J.S. (2017). A C1-C2 Module in Munc13 Inhibits Calcium-Dependent Neurotransmitter Release. *Neuron* 95, 577–590.e75.
- Neher, E. (2015). Merits and Limitations of Vesicle Pool Models in View of Heterogeneous Populations of Synaptic Vesicles. *Neuron* 87, 1131–1142.
- Regehr, W.G. (2012). Short-term presynaptic plasticity. *Cold Spring Harb. Perspect. Biol.* 4, a005702.
- Richmond, J.E., Davis, W.S., and Jorgensen, E.M. (1999). UNC-13 is required for synaptic vesicle fusion in *C. elegans*. *Nat. Neurosci.* 2, 959–964.
- Richmond, J.E., Weimer, R.M., and Jorgensen, E.M. (2001). An open form of syntaxin bypasses the requirement for UNC-13 in vesicle priming. *Nature* 412, 338–341.
- Rosenmund, C., and Stevens, C.F. (1996). Definition of the readily releasable pool of vesicles at hippocampal synapses. *Neuron* 16, 1197–1207.
- Sakaba, T. (2008). Two Ca<sup>2+</sup>-dependent steps controlling synaptic vesicle fusion and replenishment at the cerebellar basket cell terminal. *Neuron* 57, 406–419.
- Schneider, C.A., Rasband, W.S., and Eliceiri, K.W. (2012). NIH Image to ImageJ: 25 years of image analysis. *Nat. Methods* 9, 671–675.
- Shin, O.H., Xu, J., Rizo, J., and Südhof, T.C. (2009). Differential but convergent functions of Ca<sup>2+</sup> binding to synaptotagmin-1 C2 domains mediate neurotransmitter release. *Proc. Natl. Acad. Sci. USA* 106, 16469–16474.
- Shin, O.H., Lu, J., Rhee, J.S., Tomchick, D.R., Pang, Z.P., Wojcik, S.M., Camacho-Perez, M., Brose, N., Machius, M., Rizo, J., et al. (2010). Munc13 C2B domain is an activity-dependent Ca<sup>2+</sup> regulator of synaptic exocytosis. *Nat. Struct. Mol. Biol.* 17, 280–288.
- Stevens, C.F., and Wesseling, J.F. (1998). Activity-dependent modulation of the rate at which synaptic vesicles become available to undergo exocytosis. *Neuron* 21, 415–424.
- Südhof, T.C. (2004). The synaptic vesicle cycle. *Annu. Rev. Neurosci.* 27, 509–547.
- Südhof, T.C., and Rizo, J. (2011). Synaptic vesicle exocytosis. *Cold Spring Harb. Perspect. Biol.* 3, a005637.
- Watanabe, S., Liu, Q., Davis, M.W., Holloper, G., Thomas, N., Jorgensen, N.B., and Jorgensen, E.M. (2013). Ultrafast endocytosis at *Caenorhabditis elegans* neuromuscular junctions. *eLife* 2, e00723.
- Weber, T., Zemelman, B.V., McNew, J.A., Westermann, B., Gmachl, M., Parlati, F., Söllner, T.H., and Rothman, J.E. (1998). SNAREpins: minimal machinery for membrane fusion. *Cell* 92, 759–772.
- Weber, J.P., Reim, K., and Sørensen, J.B. (2010). Opposing functions of two sub-domains of the SNARE-complex in neurotransmission. *EMBO J.* 29, 2477–2490.
- Wragg, R.T., Snead, D., Dong, Y., Ramlall, T.F., Menon, I., Bai, J., Eliezer, D., and Dittman, J.S. (2013). Synaptic vesicles position complexin to block spontaneous fusion. *Neuron* 77, 323–334.
- Xu, J., Pang, Z.P., Shin, O.H., and Südhof, T.C. (2009). Synaptotagmin-1 functions as a Ca<sup>2+</sup> sensor for spontaneous release. *Nat. Neurosci.* 12, 759–766.
- Xu, J., Camacho, M., Xu, Y., Esser, V., Liu, X., Trimbuch, T., Pan, Y.Z., Ma, C., Tomchick, D.R., Rosenmund, C., and Rizo, J. (2017). Mechanistic insights into neurotransmitter release and presynaptic plasticity from the crystal structure of Munc13-1 C<sub>1</sub>C<sub>2</sub>BMUN. *eLife* 6, e22567.
- Xu-Friedman, M.A., and Regehr, W.G. (2004). Structural contributions to short-term synaptic plasticity. *Physiol. Rev.* 84, 69–85.
- Yang, X., Wang, S., Sheng, Y., Zhang, M., Zou, W., Wu, L., Kang, L., Rizo, J., Zhang, R., Xu, T., and Ma, C. (2015). Syntaxin opening by the MUN domain underlies the function of Munc13 in synaptic-vesicle priming. *Nat. Struct. Mol. Biol.* 22, 547–554.
- Zhou, K., Stawicki, T.M., Goncharov, A., and Jin, Y. (2013). Position of UNC-13 in the active zone regulates synaptic vesicle release probability and release kinetics. *eLife* 2, e01180.



## STAR★METHODS

### KEY RESOURCES TABLE

| REAGENT or RESOURCE                                                                  | SOURCE                                  | IDENTIFIER     |
|--------------------------------------------------------------------------------------|-----------------------------------------|----------------|
| Bacterial and Virus Strains                                                          |                                         |                |
| <i>Escherichia coli</i> OP50                                                         | Caenorhabditis Genetics Center (CGC)    | N/A            |
| Chemicals, Peptides, and Recombinant Proteins                                        |                                         |                |
| CaCl <sub>2</sub>                                                                    | Fluka Analytical                        | Cat#21114      |
| MgCl <sub>2</sub>                                                                    | Fluka Analytical                        | Cat#63020      |
| NaCl                                                                                 | Sigma-Aldrich                           | Cat#S9888      |
| NaHCO <sub>3</sub>                                                                   | Sigma-Aldrich                           | Cat#S6014      |
| Sucrose                                                                              | Sigma                                   | Cat#S9378      |
| KCl                                                                                  | Sigma                                   | Cat#P5405      |
| NaH <sub>2</sub> PO <sub>4</sub>                                                     | Sigma-Aldrich                           | Cat#S0751      |
| Glucose                                                                              | Sigma                                   | Cat#G8270      |
| CsCl                                                                                 | Sigma                                   | Cat#C3309      |
| CsF                                                                                  | Aldrich                                 | Cat#289345     |
| EGTA                                                                                 | Sigma                                   | Cat#E3889      |
| HEPES                                                                                | Sigma                                   | Cat#H4034      |
| Na <sub>2</sub> ATP                                                                  | Sigma-Aldrich                           | Cat#2383       |
| CsOH                                                                                 | Aldrich                                 | Cat#C8518      |
| Acetylcholine chloride                                                               | Sigma                                   | Cat#A6625      |
| γ-Aminobutyric acid                                                                  | Sigma                                   | Cat#A2129      |
| Agarose                                                                              | Sigma                                   | Lot #SLBR6299V |
| All trans-Retinal                                                                    | Sigma-Aldrich                           | CAS #116-31-4  |
| Experimental Models: Organisms/Strains                                               |                                         |                |
| <i>C. elegans</i> : N2                                                               | Caenorhabditis Genetics Center          | N2             |
| <i>C. elegans</i> : <i>unc-13(s69)</i> I                                             | Caenorhabditis Genetics Center          | BC168          |
| <i>C. elegans</i> : <i>unc-64(e246)</i> III                                          | Caenorhabditis Genetics Center          | CB246          |
| <i>C. elegans</i> : <i>tom-1(nu468)</i> I                                            | <a href="#">Dybbbs et al., 2005</a>     | KP3293         |
| <i>C. elegans</i> : <i>tom-1(nu468)</i> I; <i>unc-64(e246)</i> III                   | This paper                              | ZTH585         |
| <i>C. elegans</i> : <i>cpx-1(ok1552)</i> I                                           | Caenorhabditis Genetics Center          | RB1367         |
| <i>C. elegans</i> : <i>nuEx1515</i> [Psnb-1::UNC-13L]; <i>unc-13(s69)</i> I          | <a href="#">Hu et al., 2013</a>         | KP6893         |
| <i>C. elegans</i> : <i>cpx-1(ok1552)</i> I; <i>unc-64(e246)</i> III                  | This paper                              | ZTH390         |
| <i>C. elegans</i> : <i>hztEx41</i> [Psnb-1::UNC-13L(ΔX)]; <i>unc-13(s69)</i> I       | This paper                              | ZTH318         |
| <i>C. elegans</i> : <i>tauEx441</i> [Psnb-1::UNC-13L(ΔC1)]; <i>unc-13(s69)</i> I     | <a href="#">Michelassi et al., 2017</a> | JSD1067        |
| <i>C. elegans</i> : <i>tauSi3</i> [Psnb-1::UNC-13L(ΔC2B)]; <i>unc-13(s69)</i> I      | <a href="#">Michelassi et al., 2017</a> | JSD0805        |
| <i>C. elegans</i> : <i>hztEx19</i> [Psnb-1::UNC-13L(H696K)]; <i>unc-13(s69)</i> I    | This paper                              | ZTH9           |
| <i>C. elegans</i> : <i>tauEx313</i> [Psnb-1::UNC-13L(D3,4N)]; <i>unc-13(s69)</i> I   | <a href="#">Michelassi et al., 2017</a> | JSD0835        |
| <i>C. elegans</i> : <i>tauEx321</i> [Psnb-1::UNC-13L(D3,4E)]; <i>unc-13(s69)</i> I   | <a href="#">Michelassi et al., 2017</a> | JSD0849        |
| <i>C. elegans</i> : <i>hztEx50</i> [Psnb-1::UNC-13L(D1-5N)]; <i>unc-13(s69)</i> I    | This paper                              | ZTH555         |
| <i>C. elegans</i> : <i>hztEx51</i> [Psnb-1::UNC-13L(ΔCaM)]; <i>unc-13(s69)</i> I     | This paper                              | ZTH497         |
| <i>C. elegans</i> : <i>hztEx52</i> [Psnb-1::UNC-13L(W593R)]; <i>unc-13(s69)</i> I    | This paper                              | ZTH446         |
| <i>C. elegans</i> : <i>hztEx57</i> [Psnb-1::sUNC-13]; <i>unc-13(s69)</i> I           | This paper                              | ZTH484         |
| <i>C. elegans</i> : <i>hztEx58</i> [Psnb-1::sUNC-13(Δlinker)]; <i>unc-13(s69)</i> I  | This paper                              | ZTH480         |
| <i>C. elegans</i> : <i>hztEx109</i> [Psnb-1::sUNC-13(ΔC2A)]; <i>unc-13(s69)</i> I    | This paper                              | ZTH696         |
| <i>C. elegans</i> : <i>hztEx92</i> [Psnb-1::sUNC-13(Δlinker1)]; <i>unc-13(s69)</i> I | This paper                              | ZTH523         |
| <i>C. elegans</i> : <i>hztEx93</i> [Psnb-1::sUNC-13(Δlinker2)]; <i>unc-13(s69)</i> I | This paper                              | ZTH519         |

(Continued on next page)

**Continued**

| REAGENT or RESOURCE                                                                                              | SOURCE                                  | IDENTIFIER |
|------------------------------------------------------------------------------------------------------------------|-----------------------------------------|------------|
| <i>C. elegans</i> : hztEx94 [Psnb-1::sUNC-13( $\Delta$ linker3)]; unc-13(s69) I                                  | This paper                              | ZTH536     |
| <i>C. elegans</i> : hztEx59 [Punc-129::UNC-13L::mCherry]; nuls165 [Punc-129::UNC-10::GFP]                        | This paper                              | ZTH108     |
| <i>C. elegans</i> : hztEx60 [Punc-129::sUNC-13::mApple]; nuls165 [Punc-129::UNC-10::GFP]                         | This paper                              | ZTH584     |
| <i>C. elegans</i> : hztEx61 [Punc-129::sUNC-13( $\Delta$ linker)::mApple]; nuls165 [Punc-129::UNC-10::GFP]       | This paper                              | ZTH583     |
| <i>C. elegans</i> : hztEx66 [Punc-129::sUNC-13( $\Delta$ C2A)::mApple]; nuls165 [Punc-129::UNC-10::GFP]          | This paper                              | ZTH702     |
| <i>C. elegans</i> : nuEx1515 [Psnb-1::UNC-13L]; unc-13(s69) I; oxSi91 [Punc-17::ChIEF::mCherry]                  | This paper                              | ZTH504     |
| <i>C. elegans</i> : hztEx57 [Psnb-1::sUNC-13]; unc-13(s69) I; oxSi91 [Punc-17::ChIEF::mCherry]                   | This paper                              | ZTH525     |
| <i>C. elegans</i> : hztEx58 [Psnb-1::sUNC-13( $\Delta$ linker)]; unc-13(s69) I; oxSi91 [Punc-17::ChIEF::mCherry] | This paper                              | ZTH506     |
| <i>C. elegans</i> : hztEx62 [Psnb-1::UNC-64]; unc-64 (e246) III                                                  | This paper                              | ZTH418     |
| <i>C. elegans</i> : hztEx63 [Psnb-1::UNC-64(open)::SL2::mApple]; unc-64 (e246) III                               | This paper                              | ZTH513     |
| <i>C. elegans</i> : hztEx57 [Psnb-1::sUNC-13]; unc-13(s69) I; unc-64(e246) III                                   | This paper                              | ZTH511     |
| <i>C. elegans</i> : hztEx57 [Psnb-1::sUNC-13]; unc-13(s69) I; hztEx63 [Psnb-1::UNC-64(open)]; unc-64(e246) III   | This paper                              | ZTH556     |
| <i>C. elegans</i> : hztEx63 [Psnb-1::UNC-64(open)::SL2::mApple]; unc-13(s69) I; unc-64(e246) III                 | This paper                              | ZTH684     |
| <i>C. elegans</i> : hztEx67 [Psnb-1::UNC-64::SL2::mApple]; unc-13(s69) I; unc-64(e246) III                       | This paper                              | ZTH703     |
| Oligonucleotides                                                                                                 |                                         |            |
| UNC-13L(C2A) forward primer for fusion: acatggtaccatggatgacgttgagattacaatgatg                                    | IDT                                     | N/A        |
| UNC-13L(C2A) reverse primer for fusion: gcacagtacttacatcaaaaggaagctcaaatcgaac                                    | IDT                                     | N/A        |
| UNC-13L(R) forward primer for fusion: tttgatgtaagtactgtgcttgacgggaacg                                            | IDT                                     | N/A        |
| UNC-13L(R) reverse primer for fusion: cggcggccgctatgttcgattgatgtttgactgatgc                                      | IDT                                     | N/A        |
| Recombinant DNA                                                                                                  |                                         |            |
| Psnb-1::UNC-13L                                                                                                  | This paper                              | Phzt10     |
| Psnb-1::UNC-13L ( $\Delta$ X)                                                                                    | This paper                              | Phzt41     |
| Psnb-1::UNC-13L( $\Delta$ C1)                                                                                    | <a href="#">Michelassi et al., 2017</a> | JP975      |
| Psnb-1::UNC-13L( $\Delta$ C2B)                                                                                   | <a href="#">Michelassi et al., 2017</a> | JP679      |
| Psnb-1::UNC-13L(H696K)                                                                                           | This paper                              | Phzt19     |
| Psnb-1::UNC-13L(D3,4N)                                                                                           | <a href="#">Michelassi et al., 2017</a> | JP772      |
| Psnb-1::UNC-13L(D3,4E)]                                                                                          | <a href="#">Michelassi et al., 2017</a> | JP786      |
| Psnb-1::UNC-13L(D1-5N)                                                                                           | This paper                              | Phzt417    |
| Psnb-1::UNC-13L( $\Delta$ CaM)                                                                                   | This paper                              | Phzt381    |
| Psnb-1::UNC-13L(W593R)                                                                                           | This paper                              | Phzt355    |
| Psnb-1::sUNC-13                                                                                                  | This paper                              | Phzt448    |
| Psnb-1::sUNC-13( $\Delta$ linker)                                                                                | This paper                              | Phzt420    |
| Psnb-1::sUNC-13( $\Delta$ C2A)                                                                                   | This paper                              | Phzt501    |
| Psnb-1::sUNC-13( $\Delta$ linker1)                                                                               | This paper                              | Phzt526    |
| Psnb-1::sUNC-13( $\Delta$ linker2)                                                                               | This paper                              | Phzt503    |

(Continued on next page)

**Continued**

| REAGENT or RESOURCE                                 | SOURCE                                 | IDENTIFIER   |
|-----------------------------------------------------|----------------------------------------|--------------|
| <i>Psnb-1</i> ::sUNC-13( $\Delta$ linker3)          | This paper                             | Phzt575      |
| <i>Punc-129</i> ::UNC-13L::mCherry                  | This paper                             | A011         |
| <i>Punc-129</i> ::sUNC-13::mApple                   | This paper                             | Phzt653      |
| <i>Punc-129</i> ::sUNC-13( $\Delta$ linker)::mApple | This paper                             | Phzt648      |
| <i>Punc-129</i> ::sUNC-13( $\Delta$ C2A)::mApple    | This paper                             | Phzt1018     |
| <i>Psnb-1</i> ::UNC-64                              | This paper                             | Phzt238      |
| <i>Psnb-1</i> ::UNC-64(open)::SL2::mApple           | This paper                             | Phzt458      |
| <i>Psnb-1</i> ::UNC-64::SL2::mApple                 | This paper                             | Phzt459      |
| Software and Algorithms                             |                                        |              |
| ImageJ                                              | <a href="#">Schneider et al., 2012</a> | N/A          |
| PatchMaster                                         | HEKA Elektronik                        | V2x73.2      |
| Igor Pro                                            | Wavemetrics                            | Version 7    |
| SigmaPlot                                           | Systat Software Inc.                   | Version 13.0 |
| Other                                               |                                        |              |
| Microscope Cover Glass                              | Fisher Scientific                      | Lot#060214-9 |
| Glass Capillaries                                   | World Precision Instruments, Inc.      | Lot#2009330  |

**LEAD CONTACT AND MATERIALS AVAILABILITY**

All new strains and plasmids created in this study will be provided on request with no restrictions. Further information and requests for resources and reagents should be directed to and will be fulfilled by the Lead Contact, Zhitao Hu ([z.hu1@uq.edu.au](mailto:z.hu1@uq.edu.au)).

**EXPERIMENTAL MODEL AND SUBJECT DETAILS**

*C. elegans* strain maintenance and genetic manipulation were performed as previously described ([Brenner, 1974](#)). Animals were cultivated at room temperature on nematode growth medium (NGM) agar plates seeded with OP50 bacteria. On the day before experiments, L4 larval stage animals were transferred to fresh plates seeded with OP50 bacteria for all the electrophysiological recordings and imaging experiments.

**METHOD DETAILS**

**Constructs, transgenes and germline transformation**

All the UNC-13 fragments including full-length or mutated cDNAs were amplified by PCR and inserted into the MCSII of the JB6 vector between the KpnI and NotI sites. The *snb-1* promoter (3kb) or the *unc-129* promoter (2.6kb) was inserted into the MCSI between the SphI and BamHI sites. For fusion constructs, mCherry or mApple was inserted between NotI and MluI. Transgenic strains were isolated by microinjection of various plasmids using either *Pmyo-2*::NLS-GFP (KP#1106) or *Pmyo-2*::NLS-mCherry (KP#1480) as the co-injection marker. Integrated transgenes were obtained by UV irradiation of strains carrying extrachromosomal arrays. All integrated transgenes were outcrossed at least seven times.

**Fluorescence imaging**

Animals were immobilized on 2% agarose pads with 30 mM levamisole. Fluorescence imaging was performed at the Queensland Brain Institute's Advanced Microscopy Facility using a spinning-disk confocal system (3i Yokogawa W1 SDC) controlled by Slidebook 6.0 software. Animals were imaged with an Olympus 100x 1.4 NA Plan-Apochromat objective. Z series of optical sections were acquired at 0.11  $\mu$ m steps. Images were deconvolved with Huygens Professional version 16.10 (Scientific Volume Imaging, the Netherlands) and then processed to yield maximum intensity projections using ImageJ 1.51n (Wayne Rasband, National Institutes of Health) ([Schneider et al., 2012](#)).

**Electrophysiology**

Electrophysiology was conducted on dissected *C. elegans* as previously described ([Hu et al., 2012](#)). Worms were superfused in an extracellular solution containing 127 mM NaCl, 5 mM KCl, 26 mM NaHCO<sub>3</sub>, 1.25 mM NaH<sub>2</sub>PO<sub>4</sub>, 20 mM glucose, 1 mM CaCl<sub>2</sub>, and 4 mM MgCl<sub>2</sub>, bubbled with 5% CO<sub>2</sub>, 95% O<sub>2</sub> at 22°C. The 1mM CaCl<sub>2</sub> was replaced by 1mM MgCl<sub>2</sub> to record miniature excitatory and inhibitory postsynaptic currents (mEPSCs and mIPSCs) in 0mM of Ca<sup>2+</sup>. Whole-cell recordings were carried out at -60mV for all

EPSCs, including mEPSCs, evoked EPSCs, and sucrose-evoked responses. Stimulus-evoked EPSCs were stimulated by placing a borosilicate pipette (5–10  $\mu\text{m}$ ) near the ventral nerve cord (one muscle distance from the recording pipette) and applying a 0.4 ms, 85  $\mu\text{A}$  square pulse using a stimulus current generator (WPI). A pulsed application of sucrose (1M, 2 s), ACh (0.5M, 100ms), or GABA (0.5M, 100ms) was applied onto the ventral nerve cord using a Picospritzer III (Parker). The holding potential was switched to 0mV to record mIPSCs. The internal solution contained 105 mM  $\text{CH}_3\text{O}_3\text{SCs}$ , 10 mM CsCl, 15 mM CsF, 4mM  $\text{MgCl}_2$ , 5mM EGTA, 0.25mM  $\text{CaCl}_2$ , 10mM HEPES, and 4mM  $\text{Na}_2\text{ATP}$ , adjusted to pH 7.2 using CsOH. To estimate the readily releasable pool size, a pipette containing 0.5M sucrose solution was placed at the end of the patched muscle cell, and a 20 psi, 5 s pressure pulse was applied by Picospritzer to create a rapid jump in osmolarity at the neuromuscular junction (< 200 ms latency on average). The integrated charge transfer was computed as a function of time throughout the sucrose delivery, and the charge accumulation was corrected for the baseline holding current and spontaneous fusion events prior to sucrose application.

### Retinal feeding

NGM plates (35 mm) were seeded with 250  $\mu\text{L}$  of OP50 bacteria and 4  $\mu\text{L}$  of 100 mM all-trans retinal (Sigma). Seeded retinal plates were kept in the dark at 4°C and were used within 7 days. ChIEF transgenic worms were transferred from regular plates to retinal plates at their L4 stage and then grown for an additional 16 h in a dark box before electrophysiological experiments.

### Light stimulation

An LED light source (M470L3-C1, Thorlabs) was controlled by TTL signals from a HEKA EPC-10 double amplifier. Blue light (470 nm) through a GFP filter set was used to excite ChIEF. A train of light stimuli (1Hz or 5Hz) or a paired light stimulus was applied onto the ventral nerve cord to evoke postsynaptic currents. The duration of the light pulse was set at 3ms.

## QUANTIFICATION AND STATISTICAL ANALYSIS

### Data acquisition and analysis

All electrophysiological data were obtained using a HEKA EPC10 double amplifier (HEKA Elektronik) filtered at 2 kHz, and analyzed with open-source scripts developed by Eugene Mosharov ([http://sulzerlab.org/Quanta\\_Analysis\\_8\\_20.ipf](http://sulzerlab.org/Quanta_Analysis_8_20.ipf)) in Igor Pro 7 (Wavemetrics). To analyze mEPSCs and mIPSCs, a 4pA peak threshold was preset, under which release events are distinguished clearly from background noise. The analyzed results were re-checked by eye to ensure that the release events were accurately selected.

### Statistical analysis

When the data followed a normal distribution, a Student's t test or one-way ANOVA was used to evaluate the statistical significance. In other cases a Mann-Whitney test or one-way ANOVA following Kruskal-Wallis test was used. Data are presented as box-and-whisker plots showing the median and interquartile range, or the mean  $\pm$  SEM. A summary of all electrophysiological data is provided in [Table S1](#), with the results presented as mean  $\pm$  SEM.

## DATA AND CODE AVAILABILITY

This study did not generate/analyze datasets/code.

Cell Reports, Volume 28

**Supplemental Information**

**A Hyperactive Form of *unc-13* Enhances  
Ca<sup>2+</sup> Sensitivity and Synaptic Vesicle  
Release Probability in *C. elegans***

**Lei Li, Haowen Liu, Qi Hall, Wei Wang, Yi Yu, Joshua M. Kaplan, and Zhitao Hu**



**Figure S1**

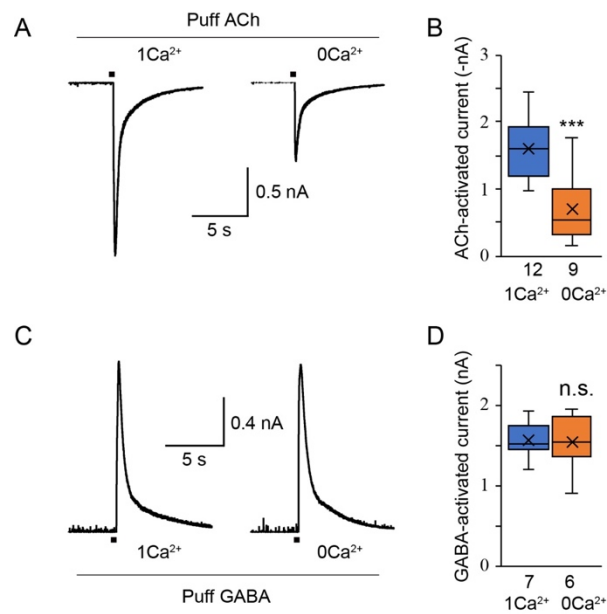

**Figure S1. The channel conductance of ACh receptors is reduced in 0mM  $\text{Ca}^{2+}$ .** Related to Figure 1. (A) Example traces of ACh-activated currents recorded from wild-type animals in 1mM and 0mM  $\text{Ca}^{2+}$  bath solutions. (B) Boxplot of the currents from A. (C) Example traces of GABA-activated currents recorded in 1mM and 0mM  $\text{Ca}^{2+}$  bath solutions, respectively. (D) Boxplot of the amplitude of the currents from C. Data are presented as box-and-whisker plots with the median (line) and mean (cross) indicated (\*\*\*,  $p < 0.001$  when compared to the 1mM  $\text{Ca}^{2+}$  recordings; n.s., non-significant when compared to the 1mM  $\text{Ca}^{2+}$  recordings; student's t-test). The number of worms analyzed for each genotype is indicated under each box.

## Figure S2

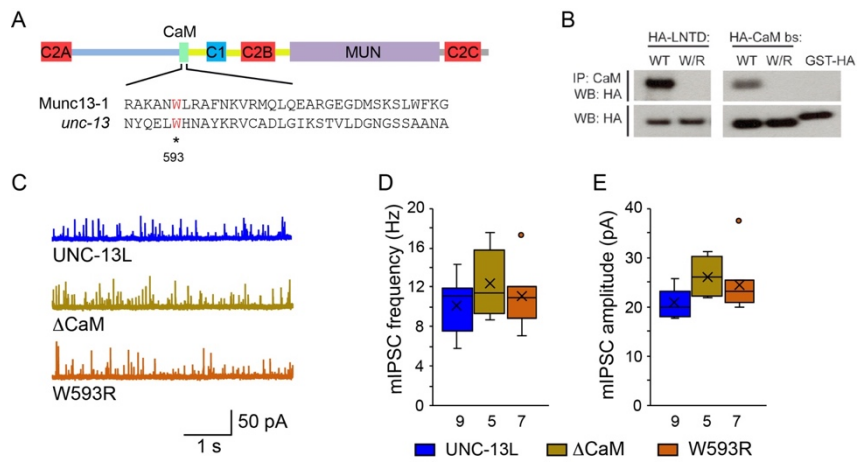

**Figure S2. Effects of calmodulin binding UNC-13L on tonic release. Related to Figure 1.** (A) Sequence alignment of the CaM domain between worm *unc-13* and rat Munc13-1. (B) Co-immunoprecipitation shows binding of the UNC-13L CaM domain and calmodulin. The binding is disrupted by mutating the conserved tryptophan (W593) to arginine (R) in the CaM domain. (C-E) Example traces of the mIPSCs and averaged mIPSC frequency and amplitude from the indicated genotypes. Data are presented as box-and-whisker plots with the median (line) and mean (cross) indicated (n.s., non-significant when compared to the UNC-13L rescue; D, one-way ANOVA; E, one-way ANOVA following Dunn's test). The number of worms analyzed for each genotype is indicated under each box.

**Figure S3**

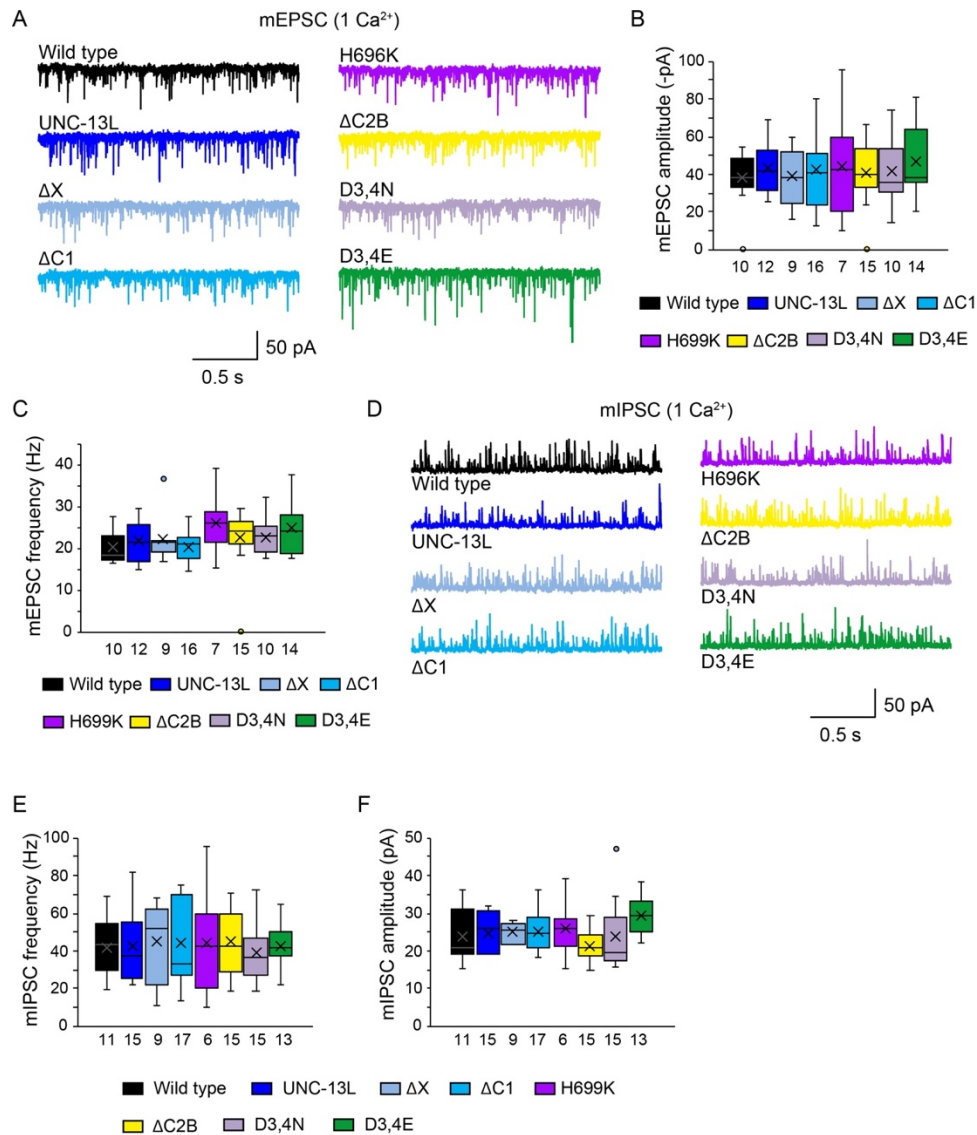

**Figure S3. Tonic release in 1mM Ca<sup>2+</sup> is unaltered by disrupting single domain function in UNC-13L. Related to Figure 2.** (A) Representative mEPSC traces recorded from *unc-13* mutants rescued by the indicated constructs in 1mM Ca<sup>2+</sup>. (B, C) Boxplot of mEPSC frequency and amplitude from the indicated genotypes in A. (D) Representative mIPSC traces recorded from *unc-13* mutants rescued by the indicated constructs in 1mM Ca<sup>2+</sup>. (E, F) Boxplot of mIPSC frequency and amplitude from the indicated genotypes in D. Data are shown as box-and-whisker plots with the median (line) and mean (cross) indicated (one-way ANOVA for data in B, E, one-way ANOVA following Kruskal-Wallis test for data in C, F). The number of worms analyzed for each genotype is indicated under each box.

**Figure S4**

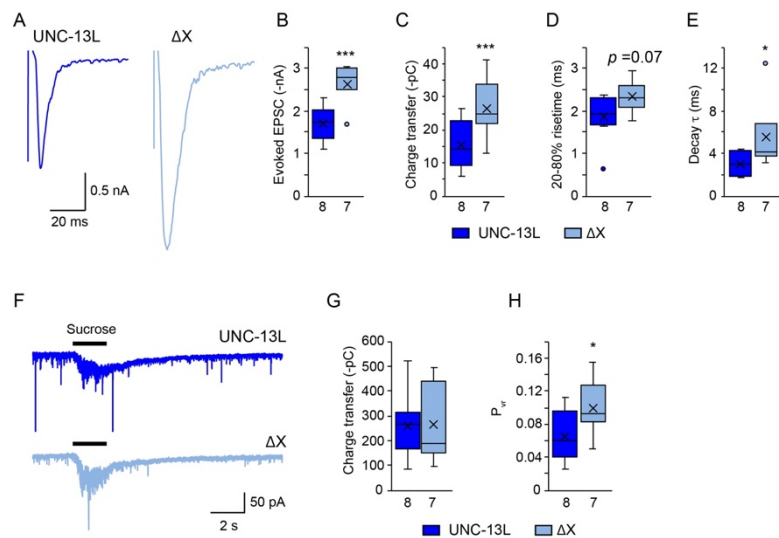

**Figure S4. The X domain inhibits evoked neurotransmitter release but not priming. Related to Figure 3.** (A) Example traces of stimulus-evoked EPSCs recorded in 1mM  $Ca^{2+}$  from UNC-13L rescue (blue) and UNC-13L $\Delta X$  rescue (red) animals. (B-E) Quantification of the evoked EPSC amplitude, charge transfer, 20-80% risetime, and decay from the same genotypes as in A. (F) Hypertonic sucrose-evoked current recorded from UNC-13L rescue (blue) and UNC-13L $\Delta X$  rescue (red) animals. (K) Averaged charge transfer from the sucrose-evoked currents in F. (L) Quantification of the probability of synaptic vesicle release ( $P_{vr}$ ) from the indicated genotypes. Data are shown as box-and-whisker plots with the both median (line) and mean (cross) indicated (\*,  $p < 0.05$ , \*\*\*,  $p < 0.001$  when compared to the UNC-13L rescue; Mann-Whitney test for data in E, student's t-test for all others). The number of worms analyzed for each genotype is indicated under each box.

**Figure S5**

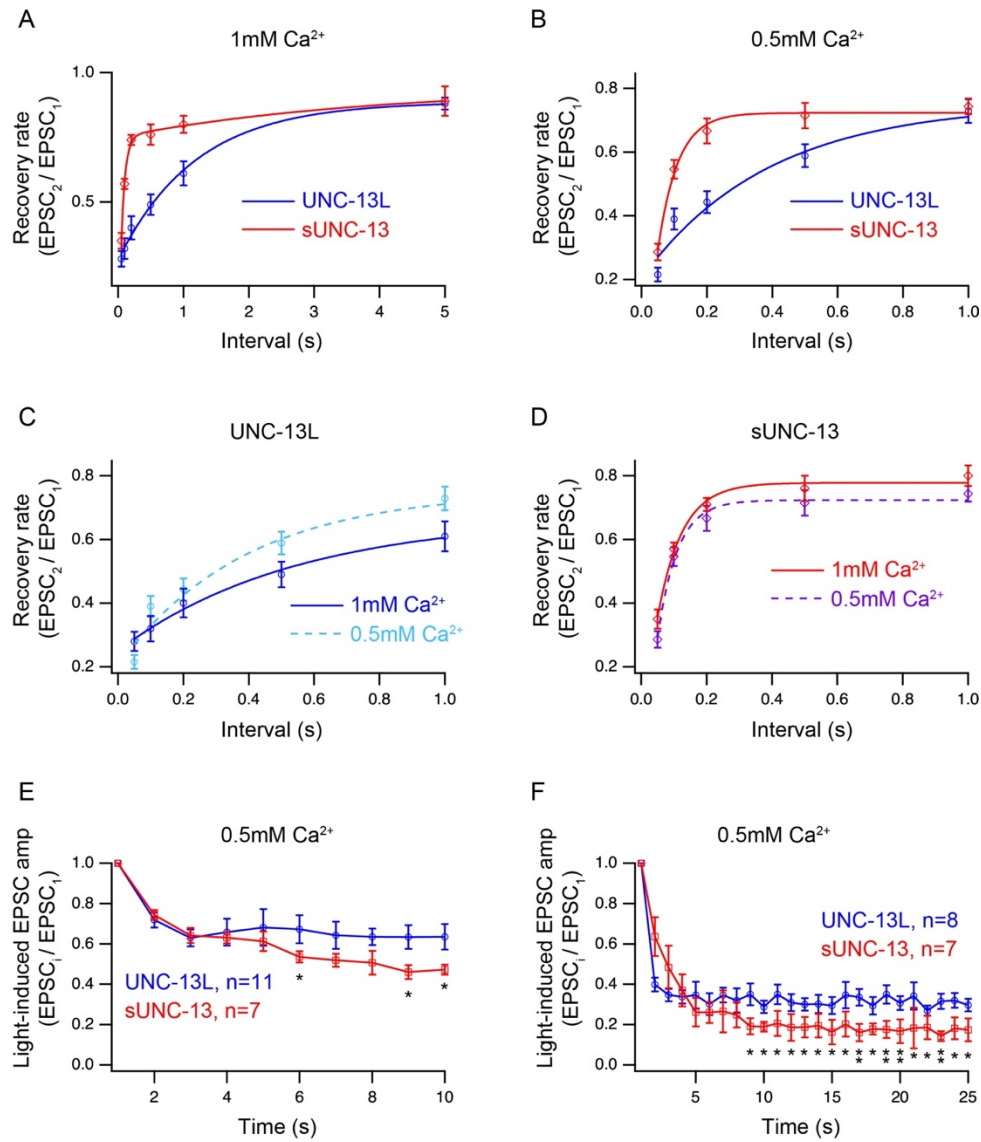

**Figure S5. Synaptic recovery and depression in 0.5mM Ca<sup>2+</sup>.** Related to Figure 4. Averaged synaptic recovery rescued by UNC-13L and sUNC-13 in 1mM Ca<sup>2+</sup> (A) and 0.5mM Ca<sup>2+</sup> (B). The recovery rate was calculated by the ratio of EPSC<sub>2</sub> to EPSC<sub>1</sub> in the paired stimulus. (C, D) Comparison of synaptic recovery between 1mM and 0.5mM Ca<sup>2+</sup> in the same genotype. (E, F) Quantification of synaptic depression by normalizing the EPSC amplitude (EPSC<sub>i</sub>) to the first EPSC amplitude in 0.5mM Ca<sup>2+</sup>. Data are mean ± SEM (\*\*,  $p < 0.01$  when compared to the UNC-13L rescue; student's t-test).



**Figure S6**

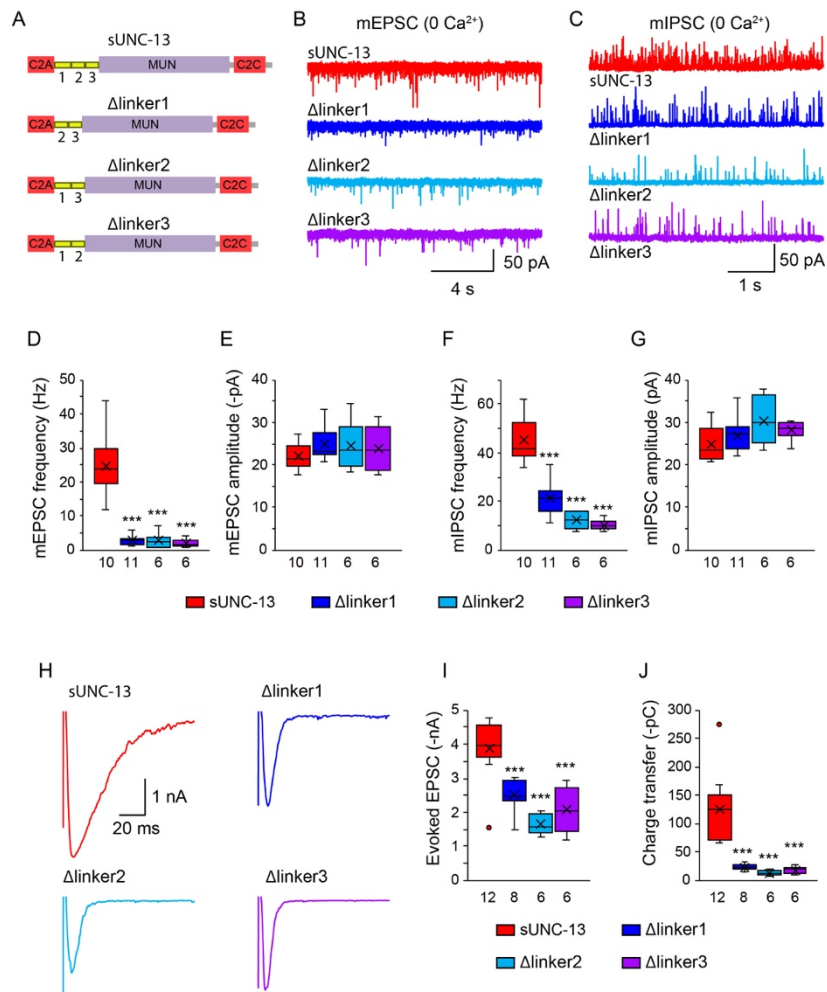

**Figure S6. The three small linkers are essential for sUNC-13 function. Related to Figure 5.** (A) Cartoon depicting the domain structure of sUNC-13,  $\Delta$ linker1,  $\Delta$ linker2, and  $\Delta$ linker3. (B-G) Representative traces and boxplot of frequency and amplitude of mEPSCs and mIPSCs recorded from the indicated genotypes in 0mM  $\text{Ca}^{2+}$ . (H-J) Representative traces and summary of the amplitude and charge transfer of the evoked EPSCs recorded from the indicated genotypes in 1mM  $\text{Ca}^{2+}$ . Data are shown as box-and-whisker plots with the both median (line) and mean (cross) indicated (\*\*\*,  $p < 0.001$  when compared to the sUNC-13 rescue; one-way ANOVA test for data in E, F, G, one-way ANOVA following Kruskal-Wallis test for data in D, I, J). The number of worms analyzed for each genotype is indicated under each box.

**Figure S7**

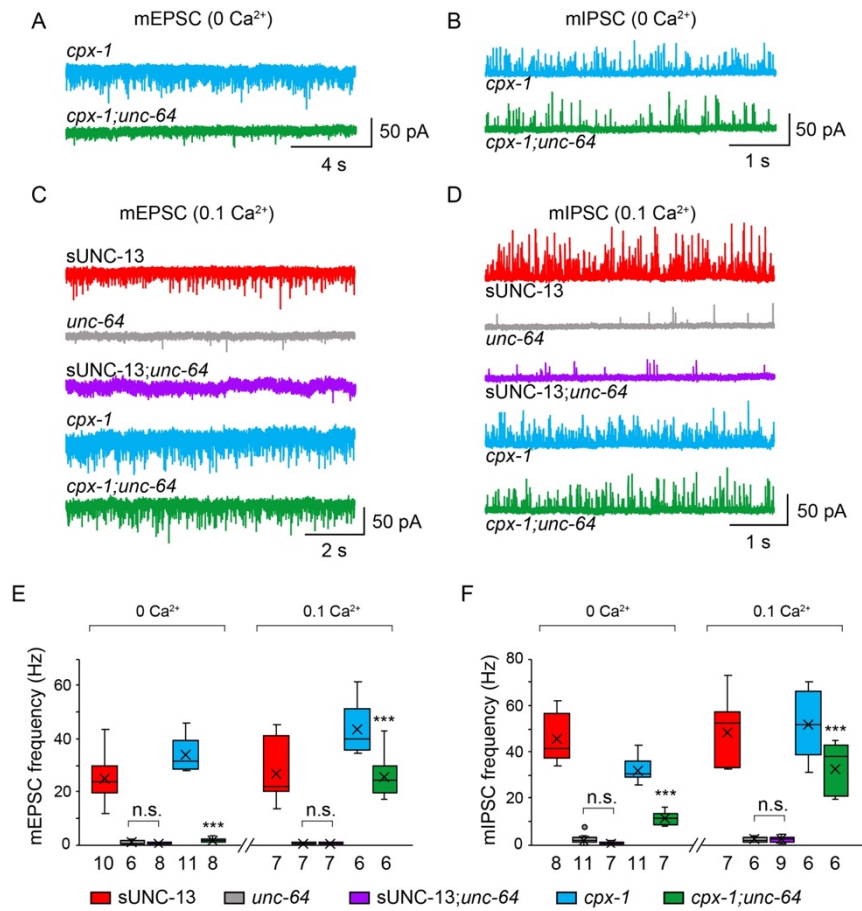

**Figure S7. Tonic release in sUNC-13 rescue but not in *cpx-1* mutants is blocked when *unc-64*/syntaxin-1A is lacking. Related to Figure 7.** (A-D) Representative traces of the mEPSCs and mIPSCs recorded from the indicated genotypes in 0mM and 0.1mM Ca<sup>2+</sup>. (E, F) Averaged frequencies of the mEPSC and mIPSC from the indicated genotypes. Data are shown as box-and-whisker plots with the both median (line) and mean (cross) indicated (\*\*\*,  $p < 0.001$  when compared to sUNC-13;*unc-64*; n.s., non-significant; one-way ANOVA). The number of worms analyzed for each genotype is indicated under each box.

Table S1. Summary of the electrophysiological data in this study. Related to Figure 1-7.

|                                  | Tonic release                 |                 |                               |                 |                               |                |                               |                | evoked EPSC     |              | RRP                    | P <sub>rr</sub>        |
|----------------------------------|-------------------------------|-----------------|-------------------------------|-----------------|-------------------------------|----------------|-------------------------------|----------------|-----------------|--------------|------------------------|------------------------|
|                                  | mEPSC (0mM Ca <sup>2+</sup> ) |                 | mEPSC (1mM Ca <sup>2+</sup> ) |                 | mIPSC (0mM Ca <sup>2+</sup> ) |                | mIPSC (1mM Ca <sup>2+</sup> ) |                | Amplitude (-nA) | Charge (-pC) | Charge (-pC)           |                        |
|                                  | Frequency (Hz)                | Amplitude (-pA) | Frequency (Hz)                | Amplitude (-pA) | mIPSC (Hz)                    | Amplitude (pA) | mIPSC (Hz)                    | Amplitude (pA) |                 |              |                        |                        |
| Wild type                        | 1.9 ± 0.2                     | 23.2 ± 1.6      | 43.5 ± 4.3                    | 23.9 ± 1.1      | 10.9 ± 1.1                    | 25.9 ± 1.1     | 42.5 ± 4.1                    | 22.5 ± 2.1     | 2.3 ± 0.2       | 20.6 ± 2.1   | 221 ± 23.1             | 0.09 ± 0.01            |
| <i>unc-13(s69)</i>               | 0.1 ± 0.01                    | 20.2 ± 3        | 0.5 ± 0.09                    | 21.1 ± 2.1      | 0.1 ± 0.01                    | 22.1 ± 4.1     | 0.6 ± 0.02                    | 21.5 ± 3.2     | 0.01 ± 0.01     | 0.05 ± 0.01  | 25.5 ± 7.1             | 0                      |
| UNC-13L                          | 1.5 ± 0.4                     | 19.3 ± 1.9      | 43.4 ± 3.7                    | 23.9 ± 1.1      | 10.1 ± 0.9                    | 22.3 ± 2.2     | 38.1 ± 3.5                    | 22.4 ± 1.1     | 1.7 ± 0.1       | 15.4 ± 2.6   | 237 ± 25.4             | 0.06 ± 0.01            |
| UNC-13LAX                        | 1.1 ± 0.2                     | 22.8 ± 0.9      | 39.1 ± 5.0                    | 22.2 ± 1.9      | 14.3 ± 0.5                    | 24.8 ± 1.5     | 44.9 ± 8.9                    | 24.9 ± 1.1     | 2.6 ± 0.2       | 26.6 ± 2.9   | 266 ± 47.4             | 0.1 ± 0.01             |
| UNC-13LAC1                       | 2.2 ± 0.7                     | 19.3 ± 1.9      | 42.3 ± 4.9                    | 20.3 ± 0.8      | 18.8 ± 2.7                    | 24.7 ± 0.9     | 43.9 ± 5.4                    | 25.2 ± 1.3     | 2.1 ± 0.2       | 20.4 ± 2.6   | Ref. Michelassi et al. | Ref. Michelassi et al. |
| UNC-13LAC2B                      | 2.8 ± 0.3                     | 20.9 ± 2.5      | 43.4 ± 3.3                    | 24.4 ± 0.8      | 25.8 ± 2.6                    | 25.7 ± 1.7     | 53.2 ± 4.2                    | 25.2 ± 1.3     | 2.7 ± 0.1       | 26.5 ± 1.9   | Ref. Michelassi et al. | Ref. Michelassi et al. |
| UNC-13L(H696K)                   | 1.7 ± 0.3                     | 19.7 ± 3.0      | 36.3 ± 3.4                    | 20.8 ± 1.8      | 16.9 ± 1.2                    | 25.2 ± 1.0     | 44.3 ± 10.6                   | 26.0 ± 2.7     | 1.6 ± 0.2       | 14.7 ± 2.9   | n/a                    | n/a                    |
| UNC-13L(D3,4N)                   | 2.6 ± 0.6                     | 24.8 ± 1.9      | 41.6 ± 4.2                    | 22.7 ± 1.1      | 24.7 ± 4.6                    | 23.4 ± 0.4     | 39.1 ± 5.2                    | 20.9 ± 1.9     | 2.8 ± 0.1       | 31.3 ± 4.4   | n/a                    | n/a                    |
| UNC-13L(D3,4E)                   | 0.7 ± 0.06                    | 20.2 ± 1.5      | 46.9 ± 5.0                    | 24.7 ± 1.6      | 7.7 ± 0.9                     | 25.9 ± 2.0     | 42.8 ± 3.4                    | 31.1 ± 2.8     | 1.6 ± 0.2       | 8.3 ± 1.3    | n/a                    | n/a                    |
| UNC-13L(D1-5N)                   | 4.4 ± 0.5                     | 25.2 ± 2.2      | n/a                           | n/a             | 32.9 ± 1.3                    | 27.5 ± 0.7     | n/a                           | n/a            | n/a             | n/a          | n/a                    | n/a                    |
| UNC-13LACaM                      | 1.3 ± 0.3                     | 20.1 ± 3.1      | n/a                           | n/a             | 12.3 ± 1.6                    | 27.5 ± 2.1     | n/a                           | n/a            | n/a             | n/a          | n/a                    | n/a                    |
| UNC-13L(W593R)                   | 1.2 ± 0.4                     | 19.1 ± 2.5      | n/a                           | n/a             | 10.9 ± 1.7                    | 26.5 ± 3.8     | n/a                           | n/a            | n/a             | n/a          | n/a                    | n/a                    |
| sUNC-13                          | 24.7 ± 2.8                    | 22.1 ± 0.9      | 41.1 ± 2.2                    | 23.5 ± 0.9      | 45.3 ± 3.0                    | 24.9 ± 1.4     | 45.3 ± 3.8                    | 23.3 ± 1.0     | 3.9 ± 0.2       | 124.5 ± 17.0 | 241 ± 19.7             | 0.5 ± 0.07             |
| sUNC-13ALinker                   | 3.2 ± 0.6                     | 26.9 ± 2.0      | 41.0 ± 4.2                    | 24.0 ± 2.6      | 40.6 ± 3.2                    | 27.9 ± 1.4     | 41.9 ± 6.2                    | 24.5 ± 3.0     | 3.2 ± 0.2       | 34.6 ± 5.4   | 303 ± 31.8             | 0.11 ± 0.02            |
| sUNC-13AC2A                      | 4.1 ± 1.2                     | 23.6 ± 2.2      | 32.7 ± 3.8                    | 19.5 ± 0.8      | 12.2 ± 1.1                    | 21.4 ± 0.7     | 31.7 ± 2.2                    | 21.6 ± 0.8     | 2.9 ± 0.2       | 59.7 ± 6.9   | 262 ± 46.6             | 0.23 ± 0.02            |
| sUNC-13ALinker1                  | 2.8 ± 0.4                     | 24.7 ± 1.1      | 36.6 ± 3.5                    | 24.7 ± 1.0      | 21.2 ± 2.1                    | 27.0 ± 1.2     | 46.8 ± 3.9                    | 26.2 ± 1.3     | 2.5 ± 0.2       | 23.0 ± 2.0   | n/a                    | n/a                    |
| sUNC-13ALinker2                  | 2.7 ± 1.0                     | 24.6 ± 2.4      | 12.5 ± 2.9                    | 20.7 ± 1.2      | 12.3 ± 1.4                    | 30.5 ± 2.4     | 40.5 ± 4.0                    | 28.4 ± 1.7     | 1.7 ± 0.14      | 12.7 ± 2.0   | n/a                    | n/a                    |
| sUNC-13ALinker3                  | 2.1 ± 0.5                     | 23.8 ± 2.1      | 31.2 ± 2.3                    | 24.4 ± 1.2      | 10.2 ± 0.9                    | 28.2 ± 0.9     | 40.9 ± 3.1                    | 25.9 ± 1.1     | 2.1 ± 0.3       | 18.0 ± 2.8   | n/a                    | n/a                    |
| <i>unc-64</i>                    | 0.9 ± 0.3                     | 18.8 ± 2.3      | 6.4 ± 1.8                     | 15.5 ± 1.3      | 2.2 ± 0.6                     | 34.7 ± 2.4     | 38.5 ± 6.5                    | 36.5 ± 2.3     | 0.14 ± 0.05     | 1.4 ± 0.03   | 113 ± 15.8             | 0.009 ± 0.003          |
| UNC-64 rescue                    | 1.6 ± 0.5                     | 26.9 ± 2.2      | 35.2 ± 3.7                    | 22.8 ± 1.8      | 10.5 ± 0.6                    | 25.8 ± 1.4     | 46.3 ± 8.1                    | 26.3 ± 2.4     | 1.5 ± 0.2       | 12.6 ± 1.6   | 211 ± 25.7             | 0.06 ± 0.007           |
| sUNC-13; <i>unc-64</i>           | 0.6 ± 0.07                    | 18.4 ± 1.7      | 5.7 ± 1.1                     | 20.4 ± 1.5      | 0.7 ± 0.2                     | 22.3 ± 4.5     | 23.0 ± 5.3                    | 33.3 ± 2.5     | 0.15 ± 0.03     | 1.11 ± 0.03  | n/a                    | n/a                    |
| UNC-64(open) rescue              | 11.9 ± 1.4                    | 20.4 ± 1.0      | 48.9 ± 5.3                    | 25.1 ± 1.6      | 35.3 ± 2.7                    | 22.6 ± 0.9     | 54.4 ± 3.5                    | 26.1 ± 1.7     | 2.5 ± 0.13      | 35.7 ± 2.6   | 251 ± 29.6             | 0.14 ± 0.03            |
| sUNC-13;UNC-64(open)             | 14.9 ± 2.4                    | 27.0 ± 1.6      | 46.8 ± 5.5                    | 22.9 ± 1.7      | 27.5 ± 3.1                    | 23.2 ± 1.3     | 41.4 ± 4.2                    | 24.7 ± 1.6     | 3.2 ± 0.14      | 84.9 ± 14.1  | 285 ± 56.7             | 0.3 ± 0.05             |
| <i>cpx-1</i>                     | 33.8 ± 1.8                    | 17.1 ± 0.9      | 95.4 ± 6.5                    | 24.9 ± 1.3      | 31.9 ± 1.6                    | 22.6 ± 1.0     | 52.7 ± 3.9                    | 22.6 ± 0.7     | 0.23 ± 0.03     | 3.4 ± 0.6    | n/a                    | n/a                    |
| <i>cpx-1;unc-64</i>              | 1.7 ± 0.3                     | 21.0 ± 1.2      | 56.4 ± 1.9                    | 22.0 ± 0.6      | 11.5 ± 1.1                    | 24.3 ± 1.3     | 73.1 ± 6.4                    | 30.3 ± 1.9     | 0.17 ± 0.02     | 3.2 ± 0.5    | n/a                    | n/a                    |
| <i>tom-1</i>                     | 1.8 ± 0.3                     | 19.4 ± 1.3      | 45.8 ± 2.7                    | 23.4 ± 1.0      | 11.0 ± 1.3                    | 24.6 ± 0.9     | 42.9 ± 4.7                    | 26.3 ± 2.3     | 3.8 ± 0.3       | 109.8 ± 18.7 | 310.1 ± 31.3           | 0.36 ± 0.06            |
| <i>tom-1;unc-64</i>              | 0.65 ± 0.07                   | 30.7 ± 3.9      | 7.3 ± 0.8                     | 19.8 ± 2.2      | 0.98 ± 0.1                    | 27.6 ± 4.0     | 15.3 ± 3.9                    | 29.7 ± 3.1     | 0.78 ± 0.2      | 13.6 ± 4.5   | n/a                    | n/a                    |
| sUNC-13; <i>tom-1</i>            | 23.8 ± 3.2                    | 19.1 ± 0.7      | n/a                           | n/a             | 32.2 ± 4.0                    | 25.1 ± 1.6     | n/a                           | n/a            | 3.1 ± 0.2       | 107.4 ± 15.9 | n/a                    | n/a                    |
| UNC-64; <i>unc-13(s69)</i>       | n/a                           | n/a             | 0.6 ± 0.09                    | 20.9 ± 2.5      | n/a                           | n/a            | 0.4 ± 0.04                    | 23.2 ± 3.5     | 0.015 ± 0.01    | 0.055 ± 0.02 | n/a                    | n/a                    |
| UNC-64(open); <i>unc-13(s69)</i> | n/a                           | n/a             | 1.3 ± 0.4                     | 21.0 ± 1.9      | n/a                           | n/a            | 2.9 ± 0.7                     | 22.5 ± 1.3     | 0.06 ± 0.02     | 0.34 ± 0.13  | n/a                    | n/a                    |

All data were collected from 3 independent experiments to ensure the observed phenotypes were replicable. Data are presented as the mean ± SEM.
